1 **A versatile toolkit for CRISPR-Cas13-based RNA manipulation in *Drosophila***

2

3

4

5 **Authors:** Nhan Huynh<sup>1</sup>, Noah Depner<sup>1</sup>, Raegan Larson<sup>1</sup>, and Kirst King-Jones<sup>1\*</sup>

6

7 \*corresponding author (kirst.king-jones@ualberta.ca)

8

9 <sup>1</sup> Department of Biological Sciences

10 University of Alberta

11 G-504 Biological Sciences Bldg.

12 Edmonton

13 Alberta T6G 2E9

14 Canada

15

16

17

18

19

20

21

22 **Keywords:** CRISPR, Cas13, CasRX, *Drosophila*, RNA manipulation, crRNA design

## 23 **Summary**

24 Advances in CRISPR technology have immensely improved our ability to manipulate  
25 nucleic acids, and the recent discovery of the RNA-targeting endonuclease Cas13 adds even  
26 further functionality. Here, we show that Cas13 works efficiently in *Drosophila*, both *ex vivo* and  
27 *in vivo*. We tested 44 different Cas13 variants to identify enzymes with the best overall  
28 performance and showed that Cas13 could target endogenous *Drosophila* transcripts *in vivo* with  
29 high efficiency and specificity. We also developed Cas13 applications to edit mRNAs and target  
30 mitochondrial transcripts. Our vector collection represents a versatile tool collection to  
31 manipulate gene expression at the post-transcriptional level.

32

## 33 **Background**

34 Most bacterial and archaeal genomes harbor Clustered Regularly Interspaced Short  
35 Palindromic Repeats (CRISPR) and encode CRISPR-associated proteins (Cas) as a defense  
36 system against bacteriophages and other invading nucleic acids [1–3]. The immune response of  
37 all CRISPR/Cas systems characterized to date includes three steps: i) adaptation and spacer  
38 acquisition, where a piece of the invading genome is incorporated into the CRISPR array; ii) the  
39 expression of mature CRISPR RNAs (gRNAs) from the processed CRISPR array and iii)  
40 interference, where Cas enzymes are guided by the gRNAs to the corresponding region of the  
41 invading genome for cleavage and degradation [4,5]. The CRISPR/Cas class II systems use a  
42 single, multidomain Cas effector protein [6]. Because of its simplicity, the single multidomain  
43 effector found in class II organisms is used in current CRISPR methods. Class II type II CRISPR  
44 Cas9 was one of the first Cas proteins studied in detail, which led to its widespread use for

45 genomic engineering (Figure 1A) [6–11]. Currently, CRISPR/Cas9 approaches allow scientists  
46 to precisely alter gene function via i) classic CRISPR to introduce short INDELS, ii) HR-based  
47 CRISPR for homology-based gene replacements or deletions, iii) somatic CRISPR for  
48 conditional gene disruption, iv) CRISPRi, (i = interference) to interfere with gene transcription,  
49 and v) CRISPRa (a = activation) to upregulate gene activity. Studies have shown that it is  
50 possible to conditionally target genes of interest by exerting spatial and temporal control over  
51 Cas9 expression or using ligand-activated Cas9 variants [8,10,12,13]. The rapid advances in  
52 CRISPR technologies have made it a popular choice over earlier nuclease-based gene editing  
53 approaches like meganucleases (MNs) [14,15], zinc finger nucleases (ZFNs) [16–18], and  
54 transcription activator-like effector nucleases (TALENs) [19,20].

55         The recent introduction of the class II type VI CRISPR/Cas13 system further expands the  
56 existing technology in significant ways. Like Cas9, Cas13 uses a guide RNA (CRISPR-RNA,  
57 aka crRNA) to identify its substrate, which is RNA rather than DNA (Figure 1B). Cas13  
58 enzymes have two distinct catalytic activities: i) an RNase activity that is mediated by two  
59 higher ekaryotic and prokaryotic nucleotide (HEPN) binding domains and ii) a gRNA  
60 maturation activity, possibly a combination of activities located in the HEPN2 and Helical-1  
61 domains [21,22]. There are currently four subtypes identified in the Cas13 family, including  
62 Cas13a (aka C2c2), Cas13b, Cas13c, and Cas13d. All Cas13 family members are smaller than  
63 Cas9, with Cas13d being the smallest protein. The small size of Cas13 proteins makes them  
64 suitable for molecular genetics (Figure 1C). All Cas13 enzymes require a 60-66 nucleotide long  
65 crRNA to ensure target specificity [2,3,23]. Similar to the gRNA in the CRISPR/Cas9 system,  
66 the crRNA used by Cas13 forms a short hairpin structure next to a short spacer sequence (28-30

67 nucleotides) that is specific to the target transcript (Figure 1D). Since CRISPR/Cas13 mediates  
68 RNA degradation, it holds the promise to replace or complement RNA interference (RNAi)  
69 approaches or other systems that interfere with transcript levels, such as CRISPRi. Despite being  
70 a powerful tool, RNAi often suffers from low efficiencies or off-target effects, whereas Cas9-  
71 based CRISPRi requires a protospacer adjacent motif (PAM), thus limiting the flexibility by  
72 which target sequences can be selected [24–28]. It is desirable to examine whether  
73 CRISPR/Cas13 can offer better specificity and efficiency than these other interference  
74 techniques.

75 *Drosophila melanogaster* is a versatile genetic model organism that is used to study a  
76 wide variety of biological processes. Traditional techniques to analyze gene function in  
77 *Drosophila* include the generation of mutations via chemical mutagens and transposable P-  
78 elements, or the use of transgenes to trigger RNAi and to express cDNAs for gain-of-function  
79 studies via the Gal4/UAS system [29–33]. Like other model organisms, the CRISPR/Cas9  
80 endonucleases have been quickly adopted by *Drosophila* researchers [10,24,25,34–39]. CRISPR-  
81 based techniques are remarkably precise and, therefore, ideal for replacing, validating, and  
82 complementing traditional approaches, in particular procedures relying on the expression of  
83 RNAi or cDNA transgenes [40,41]. Also, the large worldwide collection of gRNAs stocks has  
84 ensured the quick adaptation of CRISPR/Cas9 into mainstream *Drosophila* research [6,42,43].  
85 Given the potential of CRISPR/Cas13-based methods to replace current techniques, we explored  
86 its feasibility and reliability in *Drosophila*.

87 Our lab studies signaling pathways that control ecdysone and heme biosynthesis in the  
88 larval prothoracic gland (PG), which is part of a larger structure called the ring gland. The PG is

89 a popular model for investigating fundamental aspects of insect endocrinology and allows for the  
90 study of external cues that control the timing of ecdysone pulses [44]. Recently, we carried out a  
91 genome-wide PG-specific RNAi screen that identified 1,906 genes with critical roles in larval  
92 development [45]. In follow-up experiments, however, we often were unable to validate the  
93 RNAi-induced phenotypes by independent RNAi lines, either because no such lines existed or  
94 because other RNAi lines did not replicate the phenotype. This prompted us to develop CRISPR-  
95 based methods that could validate the RNAi results by an unrelated methodology. We previously  
96 generated two CRISPR/Cas9 toolkit collections and could use them to validate some RNAi  
97 phenotypes. However, specific issues still exist, including inconsistent gRNA efficiency and  
98 early lethality. We sought to investigate the possibility of adapting the CRISPR/Cas13 system for  
99 interference and other potential applications of this system in *Drosophila melanogaster*.

100 We generated and evaluated the catalytic activity of *Drosophila* codon-optimized Cas13  
101 (a-d) variants in a cell line derived from Sg4 embryonic cells. We refer to these Cas13 variants as  
102 CasFA[n], CasFB[n], CasFC[n] and CasFX[n], respectively (F = Fruit fly, A-C indicates the  
103 Cas13 subfamily, CasFX is the fly version of CasRX, and [n] indicates variant number)(Figure  
104 2A-D). “CasRX” was coined by Konermann et al. for the Cas13d ortholog isolated from  
105 *Ruminococcus flavefaciens* XPD3002 to distinguish it from other Cas13d variants [46]. Since we  
106 generated fly-optimized versions of CasRX, we refer to these versions as CasFX. Once we had  
107 identified a fly-optimized Cas13 variant, we used this variant to adapt existing Cas13  
108 mammalian cell culture applications for *Drosophila* cells, such as transcript tracking and RNA  
109 modification [23,47–52]. These *ex vivo* procedures formed the basis for generating a collection  
110 of transgenic CRISPR/Cas13 tools designed for *in vivo* RNA targeting. In particular, we

111 generated four Cas13 transgenic lines, namely two that either ubiquitously express CasFB or  
112 CasFX, and two that express either CasFB or CasFX under UAS control. The UAS lines allow  
113 tissue-specific expression of CasFX and CasFB by crossing them to Gal4-expressing flies. As  
114 proof-of-principle that these Cas13 transgenes work effectively *in vivo*, we generated seven  
115 crRNA transgenes to target three genes we are studying in our lab.

116

## 117 **Results**

### 118 **Generation and characterization of *Drosophila*-optimized Cas13 enzymes**

119 We generated ten Cas13 variants for each of the four Cas13 family members (a-d) by  
120 optimizing different codon subsets for codon usage in *Drosophila*. Specifically, we made ten  
121 constructs based on the *Leptotrichia wadei* Cas13a gene (*LwaCas13a*), ten variants based on the  
122 *Prevotella* sp. P5-125 Cas13b gene (*PspCas13b*), ten versions based on the *Fusobacterium*  
123 *perfoetens* Cas13c gene (*FpeCas13c*) and ten forms of the *Ruminococcus flavefaciens* XPD3002  
124 Cas13d gene (aka CasRX) (Table S1). We chose these Cas13 orthologs for the following  
125 reasons: i) based on studies in mammalian and plant cells, *LwaCas13a*, *PspCas13b* and CasRX  
126 showed improved and robust catalytic efficiency when compared to other Cas13 orthologs  
127 [23,46,50,53], ii) unlike some Cas13 orthologs, the Cas13 genes we chose for our studies do not  
128 require a specific protospacer flanking sequence (PFS) for efficient target RNA identification  
129 [23,46,50,53]. In the case of *PspCas13b*, the original study, which was performed in *Escherichia*  
130 *coli*, showed that the PFS is necessary for RNA cleavage activity. However, when the same  
131 enzyme was tested in mammalian cells and plants, the PFS was no longer required [48,49,52].

132 Finally, iii) we also selected Cas13c, since only a few studies have examined this Cas13 subtype  
133 [23].

134 To evaluate the RNA degradation efficiency of these fruit fly-optimized Cas13 enzymes,  
135 we needed to establish a stable reporter gene cell line. For this, we used the PhiC31 integrase  
136 system to generate a dual-reporter transgene in the *Drosophila* embryo cell line Sg4-PP-27F [54]  
137 that simultaneously expressed eCFP (enhanced Cyan Fluorescent Protein) and DsRed  
138 (*Discosoma* Red fluorescent protein) (Figures S1A, C). Sg4 is one of four embryonic cell lines  
139 isolated from the original Schneider's line 2 (S2) and differs from the popular S2 cells in a range  
140 of transcriptional properties [55]. Importantly, Sg4-PP-27F cells were modified from the original  
141 Sg4 cells by adding a PhiC31 docking site to the second chromosome [54]. The inserted eCFP  
142 and DsRed transgenes are each controlled by the ubiquitous *actin 5C* promoter (*act5C*). To  
143 ensure this transgene's stability, we added a *Neo<sup>R</sup>* gene cassette, which encodes aminoglycoside  
144 kinase, and ensures cell survival in the presence of G418 antibiotics [56]. We refer to this new  
145 transgenic cell line as Sg4\_CD (C = eCFP, D = DsRed), and our subsequent cell culture  
146 experiments were based on this line. To transform the Sg4\_CD cell line with appropriate vectors,  
147 we generated plasmids that harbored a single copy of a given Cas13 variant and a single crRNA  
148 (the vector allows for adding multiple crRNAs). These constructs, here referred to as pC13cr01,  
149 allowed us to simultaneously express Cas13 as well as its crRNA in transfected cells (Figure  
150 S1D, Table S2). To ensure stable transfection, we also included the *PURO* gene in the pC13cr01  
151 vector. The *PURO* gene encodes the puromycin N-acetyltransferase, which allows cells to  
152 survive in media supplemented with puromycin [57,58] (Figure S1D, Table S2). Thus, the  
153 presence of two resistance markers allowed for dual selection during the transfection

154 experiments. Besides testing the *Drosophila*-optimized Cas13 variants, we also examined the  
155 efficiency of the original Cas13 orthologs in the Sg4\_CD cell line (Tables S1, S2).

156 We measured the efficiency of the Cas13 variants by targeting one of the two reporter  
157 gene mRNAs and quantifying mRNA levels via qPCR. To accomplish this, for each Cas13  
158 variant, we used two independent single crRNAs targeting eCFP mRNA (crRNA1 and crRNA2,  
159 Figure 2), while the DsRed mRNA was not targeted and served as a control (Figure S2, Table  
160 S4). To ensure that any observed differences derived only from the catalytic activity of the  
161 Cas13/crRNA complex, and not from either Cas13 or the crRNA itself, we also tested the eCFP  
162 expression level in the presence of a non-targeting (NT) Cas13/crRNA complex. In our hands,  
163 the different Cas13 variants showed a wide range of RNA-targeting efficiency, with some of the  
164 variants failing to trigger RNA degradation. The original Cas13a, (aka LwaCas13a) showed  
165 roughly 35-40% eCFP knock-down efficiency, while the best-performing *Drosophila* variant,  
166 CasFA5, was only slightly better and exhibited 47% efficiency (Figure 2A). For the Cas13b (aka  
167 PspCas13b) variants, we measured 45-51% efficiency for the original Cas13b enzyme, while the  
168 best-performing *Drosophila* variants were CasFB5 and CasFB8, both of which were 65-70%  
169 efficient (Figure 2B). The Cas13c group was the least efficient in knocking down eCFP, with the  
170 best line, CasFC4, only accomplishing a 25% knock-down (Figure 2C). In contrast, the Cas13d  
171 group performed best, displaying 82% efficiency for the original Cas13d (CasRX) enzyme,  
172 whereas the CasFX4 variant was even better and reached a 90% knock-down (Figure 2D).

173 To validate these qPCR data, we quantified the protein levels of eCFP and DsRed based  
174 on their fluorescence and Western blotting. We selected the best-performing enzyme variants  
175 from all four groups, namely three CasFA variants, four CasFB versions, one CasFC enzyme,



176 and six CasFX forms. We then assessed the efficiency of the eCFP knock-down via  
177 immunofluorescence (Figure 2E) and Western blotting (Figure S3A-D). Both approaches  
178 showed comparable results and confirmed that CasFX4 was the overall most efficient Cas13  
179 enzyme of the entire cohort, showing ~90% and ~95% efficiency on the mRNA and protein  
180 levels, respectively.

181       Next, we sought to investigate whether the subcellular localization of Cas13 would affect  
182 the enzyme's catalytic activity. Since mRNAs mature in the nucleus but are translated in the  
183 cytoplasm, we wondered if Cas13 performance could be improved by identifying which cellular  
184 compartment is optimal for Cas13 activity. To test this, we selected the original Cas13 variants  
185 and their corresponding best-performing *Drosophila* counterparts (CasFA5, CasFB8, CasFC4,  
186 and CasFX4), and fused them either with a nuclear localization signal (NLS) or a nuclear export  
187 signal (NES) (Figure S3E). These constructs were based on similar designs from other studies  
188 and our approaches (Figure S3F) [8,10,12,35,39,59–62]. Then, as described above, we again  
189 examined how efficiently eCFP was knocked down. Overall, we observed similar efficiencies  
190 when the same Cas13 variant was tested in the nucleus or cytoplasm, indicating that the catalytic  
191 activity of these Cas13 variants was independent of the subcellular localization (Figure S3G).  
192 For LwaCas13a, PspCas13b and CasRX, this result is consistent with a previous study in plants  
193 [52]. Since we found no significant differences, we decided to use Cas13 variants without any  
194 localization signal for experiments that followed.

195       Together, these data suggested that the Cas13 variants retain their RNA-cleaving activity  
196 in *Drosophila* Sg4\_CD cells, but efficiencies varied considerably. Among the *Drosophila* codon-

197 optimized Cas13 enzymes we generated, we noticed consistent and robust efficiency of two  
198 CasFB versions (namely CasFB5 and CasFB8) and the overall best Cas13 variant, CasFX4.

199

## 200 **Evaluating the collateral activity of *Drosophila*-optimized Cas13 variants**

201       Studies in *Escherichia coli* showed that once the Cas13/crRNA complex is bound to its  
202 target RNA, the HEPN-nuclease domains become active and are capable of cleaving not just the  
203 intended target, but also RNA molecules that are in the vicinity of the Cas13/RNA complex,  
204 resulting in the non-specific RNA degradation referred to as "collateral activity" (Figure S4A)  
205 [21–23,63]. Subsequent studies reported that the collateral activity of Cas13 varied from system  
206 to system. While non-specific RNA degradation was detected in human U87 glioblastoma cells  
207 [63], no collateral activity was detected in human embryonic kidney 293FT cells or in the plant  
208 *Nicotiana benthamiana* [23,49,50]. To test for collateral activity in our hands, we examined the  
209 best-performing Cas13 variants using the same transgenic cell line Sg4\_CD. Specifically, we co-  
210 expressed eCFP, DsRed, and Neo<sup>R</sup> independently, each with an *act5C* promoter. Since eCFP,  
211 DsRed, and aminoglycoside kinase (encoded by *Neo<sup>R</sup>* gene) are foreign genetic components, we  
212 reasoned that manipulating their expression via Cas13 would not have a significant impact on the  
213 physiology of SG4\_CD cells. The idea was to target eCFP with specific crRNAs in the presence  
214 of Cas13 and monitor the expression of DsRed as a readout for collateral activity. Both eCFP  
215 and DsRed were presumed to be highly expressed in a coordinate fashion, since the *act5C*  
216 promoter controlled each transgene. As such, if the interference activity of Cas13 was not  
217 specific to eCFP, we expected to detect differences in DsRed expression via qPCR. Using this  
218 approach, our data showed that the selected Cas13/crRNA complexes only affected target-eCFP

219 expression, while DsRed expression appeared unperturbed (Figure S4B). These data suggest that  
220 the tested Cas13 enzymes did not have any detectable collateral activity, at least not in the  
221 *Drosophila* Sg4\_CD cell line.

222

### 223 **Testing the fidelity of *Drosophila* Cas13 variants**

224 Our efforts identified several Cas13 versions that efficiently degraded target RNAs in  
225 *Drosophila* cells while exhibiting no detectable collateral activity. Next, we wanted to assess  
226 how mismatches between crRNAs and their cognate target RNA would affect RNA degradation  
227 as a means to define Cas13 fidelity. In particular, we were curious as to whether Cas13 would  
228 display higher fidelity - and as such, lower off-target rates - than RNA interference (RNAi),  
229 which is widely used in a variety of research models, ranging from cell culture to whole  
230 organisms [64–66]. While RNAi is an attractive and powerful tool, its usability is often  
231 hampered by its off-target activity, which can make it challenging to interpret phenotypes, and  
232 validation strategies involving codon-modified genes/cDNAs are cumbersome and harbor pitfalls  
233 [26,67,68]. Other validation strategies include non-overlapping RNAi constructs targeting  
234 distinct regions on the mRNA, classic mutants, or conditional CRISPR/Cas9 approaches. To test  
235 the propensity of our Cas13 enzymes to degrade off-target RNAs due to small sequence  
236 differences, we selected the six top-performing variants for which we had not detected any  
237 collateral activity (CasFA5, CasFB5, CasFB8, CasFC4, CasFX4, and CasFX8). Specifically, we  
238 generated mismatches in the crRNA-2 spacer sequence and measured the ability to degrade its  
239 target RNA, eCFP. To indicate the mismatch location, we referenced the position of the altered  
240 nucleotide relative to the stem loop-forming direct repeat of the crRNA. The nucleotide at

241 position 1 represents the one closest to the DR, and the highest number corresponds to the  
242 nucleotide farthest away from the DR.

243         Among all variants that we tested, all had a central region that appeared to be intolerant  
244 to single mismatches. The CasFA5, CasFB5, and CasFB8 variants showed some tolerance to  
245 single mismatches outside the core region, namely nucleotides #1-3 at the 5'-end and nucleotides  
246 #28 and higher at the 3'-end. In contrast, the core region showed no tolerance to mismatches  
247 (Figures 3A, B, C, D). Remarkably, CasFC4, CasFX4 and CasFX8 variants showed no tolerance  
248 for mismatches throughout the entire range, including the extreme 5' and 3' ends. To examine  
249 this further, we tested the outermost nucleotides for both CasFX variants (position #1 and #30).  
250 Even single mismatches at either end of the spacer region abrogated interference activity,  
251 indicating that these two variants are highly specific and have the lowest off-target potential  
252 (Figures 3E, F). Since four of the variants had some tolerance towards a single mismatch, we  
253 further examined mismatch tolerance by introducing more than one mutation per crRNA.  
254 Specifically, we generated constructs encoding two, three, or four mismatches in the eCFP-  
255 crRNA. In all tested conditions, we included at least one mismatch from the extreme 5' or 3' end  
256 of the spacer. In our hands, none of the *Drosophila* Cas13 variants exhibited tolerance to  
257 crRNAs with mismatches of more than one nucleotide (Figures S4 C-H). These data are in  
258 agreement with other studies using similar approaches [51,69,70]. Taken together, this suggests  
259 that the *Drosophila* Cas13 variants tested here are highly specific and display no tolerance to a  
260 single mismatch in the core region of the spacer, and none of the enzymes were functional with  
261 two mismatches in the crRNA. The CasFA, CasFB5 and CasFB8 variants did tolerate a single  
262 mismatch located at either end outside the core region. In contrast, the CasFC4, CasFX4 and

263 CasFX8 variants appeared to require a perfect match of the entire spacer region to mediate  
264 interference. We conclude that the CasFX4 and CasFX8 variants will likely have the lowest off-  
265 target rate while retaining optimal RNA-targeting efficiency among the Cas13 enzymes tested  
266 here.

267

### 268 **Nuclease-dead CasFX for applications involving transcript detection.**

269 The CRISPR/Cas9 system has been modified to allow for non-nuclease activities, such as  
270 for transcription interference (CRISPRi) as well as transcriptional activation (CRISPRa)  
271 [8,10,12,39]. Similarly, the Cas13 system can also be adapted for other purposes and may be  
272 more suitable for certain applications than CRISPR/Cas9-based methods. For instance, the  
273 ability to target RNA instead of DNA has the advantage that it is reversible. Also, Cas13 may  
274 allow for the development of techniques that cannot be accomplished by corresponding  
275 CRISPR/Cas9 approaches: By abolishing the nuclease activity of Cas13 while retaining its RNA  
276 binding capability, one could use the enzyme to specifically target RNAs to track these  
277 transcripts in the cell. Another option would be to fuse Cas13 with different protein domains to  
278 affect post-transcriptional processing of target mRNAs, e.g., altering transcript splicing or  
279 stability. Specific efforts have been made to investigate these applications with promising results  
280 [48–50,52,71].

281 We were particularly interested in a nuclease-deficient Cas13 variant as a tool to validate  
282 specific RNA-protein interactions. For our proof-of-principle approach, we selected the Cas13  
283 variant with the most consistent, robust, and specific interference activity, CasFX4 (hereafter  
284 referred to as simply CasFX), and introduced quadruple mutations in the catalytic HEPN

285 domains (R239A/H244A/R858A/H863A). These mutations abolish the nuclease activity but not  
286 RNA binding activity in the CasRX variant [50,52,71] (Figure 4A). We first tested whether the  
287 mutant CasFX still retained nuclease activity by testing our validated crRNAs against eCFP in  
288 the Sg4\_CD cell line. As expected, the mutant CasFX failed to interfere with the expression level  
289 of eCFP, whereas the wild-type variant worked efficiently (Figures 4B, C). We conclude that this  
290 mutant CasFX variant, similar to the corresponding variants in other species, lost its nuclease  
291 activity. We hereafter refer this variant as dCasFX (d = dead).

292 To assess whether crRNA-guided dCasFX would specifically interact in a non-  
293 destructive manner with its intended target mRNA, we tested its ability to co-IP a protein known  
294 to bind to the same mRNA. As such, immunoprecipitation of dCasFX should pull down the  
295 mRNA as well as its bound protein, which can be detected via Western blotting. This approach is  
296 useful to validate the RNA-binding activity of dCasFX, as well as the interaction between  
297 mRNA and the interrogated protein. To test this, we used an isoform of the ferritin heavy chain 1  
298 mRNA (*Fer1HCH-RA*), which carries a canonical iron-responsive element (IRE) at its 5'-end.  
299 This IRE allows iron regulatory protein 1A (IRP1A), the *Drosophila* ortholog of human iron  
300 regulatory protein 1 (IRP1), to bind to the *Fer1HCH-RA* mRNA [72–76]. Specifically, we used  
301 the IRP1A<sup>C450S</sup> form [74], which is constitutively RNA-binding. We then designed a series of  
302 crRNAs that direct dCasFX to its target, *Fer1HCH-RA*, and tested whether immunoprecipitation  
303 of dCasFX would also pull down IRP1A. We transfected and lysed cells containing the dCasFX  
304 and crRNA components, and mixed this lysate with a second sample obtained by lysing cells  
305 containing transfected *Fer1HCH-RA* mRNA and IRP1A<sup>C450S</sup>. By combining the two lysates, the  
306 dCasFX/crRNA enzyme should bind to the *Fer1HCH-RA* mRNA/IRP1A<sup>C450S</sup> complex. If the

307 interaction occurs, immunoprecipitation of dCasFX (via its added HA tag) is expected also to  
308 pull down IRP1A<sup>C450S</sup> (Figure 4D).

309         A key question for this strategy was how far the recognition site for dCasFX/crRNA  
310 needed to be away from the IRE to allow binding of both proteins, dCas13 and IRP1A, to the  
311 *Fer1HCH-RA* mRNA. To this end, we generated nine different crRNAs, representing binding  
312 sites spaced ~150 bases apart to roughly cover the entire 1.7 kb *Fer1HCH-RA* mRNA. One of  
313 the sites (crRNA #3) partially overlapped with the IRE site, which served as a control to disrupt  
314 IRP1A binding. Using this strategy, we found that immunoprecipitation of dCasFX successfully  
315 pulled down IRP1A, as long as the crRNA binding site was sufficiently removed from the IRE.  
316 As expected, this interaction appeared to be dependent on the distance between the crRNA target  
317 site and IRE sequence, since an insufficient distance should cause steric hindrance between the  
318 two proteins (Figure 4E). As a control, we used a non-targeting (NT) crRNA to ensure the  
319 interactions we observed were specific. The control showed that immunoprecipitation of dCasFX  
320 with a non-*Fer1HCH-RA* mRNA-targeting crRNA was not able to pull down IRP1A.

321         We also tested whether we can simply detect immunoprecipitated *Fer1HCH-RA* mRNA  
322 via real-time PCR (qPCR). In the absence of IRP1A, dCasFX appears to bind to the *Fer1HCH-*  
323 *RA* mRNA efficiently, and we found no significant differences between the nine different  
324 crRNAs (Figure S5A). Interestingly, when we repeated the experiment in the presence of IRP1A,  
325 we noticed a ~4-fold reduction of immunoprecipitated *Fer1HCH-RA* mRNA when we used  
326 crRNAs #1-4 (Figure S5B). This is consistent with the results for co-immunoprecipitated IRP1A  
327 (Figure 4E), suggesting that competition between IRP1A and dCasFX (bound to crRNAs #1-4)  
328 affected the RNA-binding ability of both proteins. We conclude that dCasFX is a reliable tool to

329 validate interactions between a protein and its candidate target RNA. In addition to RNA-  
330 immunoprecipitation, dCasFX could potentially also used for other *in vivo* studies, such as  
331 locating a transcript of interest to elucidate its subcellular localization or for co-localization  
332 studies, or to determine whether a given protein is bound to its target RNA or unbound.

333

### 334 **Targeting mitochondrial RNAs via Cas13**

335 Like CRISPR/Cas9, Cas13 needs to form a complex with a crRNA before it can identify  
336 and cleave its target transcript [22,23]. Since the Cas13/crRNA complex harbors a single protein,  
337 it can be easily tagged with a mitochondrial targeting sequence to cleave RNA in mitochondria,  
338 which is not feasible with RNAi. *Drosophila* mitochondria contain multiple copies of circular  
339 DNA (mtDNA), which encode tRNAs, rRNAs, and polypeptides important for oxidative  
340 phosphorylation. The study of mitochondrial genes is important, because mutations in mtDNA  
341 can cause devastating human disorders, such as Leber's hereditary optic neuropathy, which  
342 causes blindness [77,78,79]. To modify CRISPR/Cas13 applications for mitochondrial-encoded  
343 transcripts, we added a sequence encoding an N-terminal mitochondrial targeting peptide derived  
344 from the nuclear-encoded *translocase of the inner mitochondrial membrane 23 (tim23)* gene. For  
345 this approach, we generated a modified version of our highly efficient CasFX variant, which we  
346 termed CasFX<sup>mt</sup>. The CasFX<sup>mt</sup>/crRNA complex is predicted to be imported into the  
347 mitochondrial matrix, where it should bind to and cleave the target transcripts (Figures 4F, G).

348 To test the functionality and efficiency of the CasFX<sup>mt</sup> variant, we co-transfected  
349 CasFX<sup>mt</sup> with constructs encoding a crRNAs against either *mitochondrial cytochrome c oxidase*  
350 *subunit I (mt:CoI, aka COXI)* or *mitochondrial cytochrome c oxidase subunit II (mt:CoII, aka*



351 *COXII*). Both *COXI* and *COXII* are highly expressed mitochondrial-encoded genes critical for  
352 oxidative phosphorylation [80–82]. We analyzed the expression levels of *COXI* and *COXII* via  
353 qPCR as well as western blots. To put these results into context, we generated RNAi samples  
354 against each of these targets, and used the original CasFX (CasFX<sup>O</sup>, O = original) variant, which  
355 lacks the mitochondrial sequence, as a control. In our hands, RNAi targeting either *COXI* or  
356 *COXII* had no significant effect on the expression of these two transcripts. Similarly,  
357 CasFX<sup>O</sup>/crRNA produced no significant effects (Figures 4H, I). In stark contrast, CasFX<sup>mt</sup>  
358 caused a 4-5-fold reduction of the COX transcripts and resulted in a substantial drop in protein  
359 levels as well (Figures 4H, I). To ensure that this result was reproducible, we tested additional  
360 RNAi as well as crRNAs sequences, all of which target *COXI* or *COXII* transcripts (Figure S2).  
361 In all cases, the observed results were comparable (Figures S5C-E), suggesting that CasFX<sup>mt</sup> is a  
362 useful tool to target mitochondrial-encoded transcripts.

363

#### 364 **Cas13-ADAR2 for RNA modification**

365 One intriguing aspect of CRISPR/Cas13 has focused on the modification of RNA, which  
366 led to two approaches, namely "RNA editing for programmable A to I replacement" (REPAIR)  
367 and "RNA editing for specific C to U exchange" (RESCUE) [47,50]. These methods allow for  
368 programmable adenosine-to-inosine editing as well as cytosine-to-uridine editing, respectively.  
369 The ability to modify genetic information at the RNA level may be advantageous, because,  
370 unlike Cas9 which causes a permanent change in the genome, RNA modifications via Cas13 are  
371 reversible due to RNA turnover [8,12,39,74]. As such, Cas13-based approaches may be suitable

372 for future therapies, where Cas13 could be used to repair missense mutations in transcripts  
373 without affecting a patient's genome.

374 In the REPAIR systems used in mammalian cells, the nuclease-dead PspCas13b was  
375 fused to the RNA-modifying domain of Adenosine Deaminase Acting on RNA 2 (ADAR2). In  
376 their original approach, Cox et al. found that the first REPAIR version (REPAIRv1) had  
377 substantial off-target activity. Subsequently, they generated REPAIRv2, which harbored two  
378 point mutations in the ADAR2 domain (T375G and E488Q). This version showed high  
379 specificity and robustness in mammalian cells [50].

380 Given its success in mammalian cell systems, we wondered whether a Cas13-ADAR  
381 fusion would be functional in *Drosophila*. The insect ADAR protein appears to function  
382 similarly to its human counterpart [83], suggesting that constructs based on mammalian ADAR2  
383 would work in *Drosophila*. We first fused the above-described dCasFX to the mutant human  
384 ADAR2 domain that carries equivalent mutations as the REPAIRv2 we mentioned earlier. We  
385 refer to this construct as FREPAIRv2 (F = fruit fly), and tested for its editing efficiency (Figure  
386 5A). To test for Cas13-ADAR2 activity, we generated a system that uses a dual reporter  
387 transgene in the *Drosophila* embryo cell line Sg4-PP-27F. Similar to the earlier described  
388 Sg4\_CD line; this cell line carries the independently expressed *eCFP* and *DsRed* transcription  
389 units in the genome, each with their own *actin5* promoters. However, unlike the Sg4\_CD line,  
390 we introduced a point mutation into the eCFP coding region that converts a tryptophan residue  
391 57 (W57\*) TGG into an early stop codon (TGA), which we refer to as eCFP\*. Also, we termed  
392 this new cell line "Sg4\*" line to distinguish it from the original Sg4\_CD (Figure S1B). Next, we  
393 co-expressed FREPAIRv2 and an eCFP-crRNA, which carries a single mismatch A to C at the

394 position that corresponds to the introduced stop codon (Figures 5A, B). If the FREPAIRv2 is  
395 capable of editing its target RNA encoded by *eCFP\**, the stop codon should be reverted to the  
396 wild-type tryptophan residue (W57), and the resulting full-length eCFP should be detectable via  
397 Western blotting and, if efficiency is sufficiently high, via fluorescence from the restored CFP.  
398 Using this strategy, we found that we were able to detect fluorescence at a wavelength of 405 nm  
399 as early as 36 hours after transfection, indicating that detectable levels of eCFP had been  
400 produced. eCFP fluorescence continued to increase, with substantially higher levels at the 60-  
401 hour time point (Figure 5D). When we conducted Western Blots to validate these data, we saw  
402 corresponding results, with detectable eCFP protein at 36 hours and progressively higher levels  
403 from 42 to 60 hrs after transfection (Figure 5C). We conclude that Cas13-ADAR2 works  
404 effectively in *Drosophila* and can be used to modify target mRNAs, such as reverting transcripts  
405 carrying missense mutations without altering the genome.

406 For the above approach, we followed a similar path that was used in the original study  
407 [50] where the mismatch (C→A) was placed in the center of the crRNA spacer, measured at the  
408 26<sup>th</sup> nucleotide of 50 nucleotides (nt) spacer, relative to the stem loop-forming direct repeat of  
409 the crRNA. To evaluate the editing efficiency in correlation to mismatch position and spacer  
410 length, we tested a series of crRNA constructs with the same spacer length of 50 nt; however, we  
411 changed the relative mismatch distance to the hairpin by increments of 8 nt (Figure 5E). We then  
412 performed reverse transcription and sequenced a minimum of ten randomly selected eCFP  
413 cDNAs per construct. This was followed by sequencing to assess the fraction of clones that  
414 harbored the repaired codon for tryptophan #57, expressed as editing rate (Figure 5F). Based on  
415 our findings, the crRNA that carried the mismatch at position 26 relative to the hairpin

416 ("mismatch distance", Figure 5E) resulted in the highest efficiency (Figure 5F), consistent with  
417 other studies [50]. We then tested the effect of varying spacer length while keeping the mismatch  
418 distance at 26 nt. We tested spacer lengths from 30 nt to 80 nt, and in all cases, we observed  
419 similar efficiencies, all of which were comparable to a 50 nt spacer (Figure 5G). Based on these  
420 findings, we conclude that FREPAIRv2 works best when using a mismatch distance of 26 nt,  
421 whereas the spacer length did not appear to affect the editing efficiency [50].

422 To evaluate the off-target tendencies of FREPAIRv2 in *Drosophila* cells, we examined  
423 the cDNA sequences for additional A→I modifications, which is straightforward since inosine is  
424 recognized as guanosine by the reverse transcriptase. However, we scored any unpredicted  
425 sequence deviations as potential off-target events and plotted them relative to the mismatch  
426 distances and spacer lengths (Figures 5F, G). This strategy revealed that some off-target effects  
427 persisted, albeit at a low level across all crRNAs that we tested. Given that these effects are  
428 random, and distributed across multiple RNA molecules, it appears likely that this off-target  
429 activity has no or inconsequential impact on phenotypes. However, future studies are needed to  
430 improve the specificity of this editing system further.

431

### 432 **Generation and characterization of transgenic Cas13 flies**

433 Our data demonstrated that Cas13 works well in *Drosophila* Sg4 cells and can be used  
434 for purposes beyond RNA cleavage. We next sought to generate transgenic fly lines carrying  
435 Cas13 variants and characterize their efficacy *in vivo*. To this date, no study has analyzed the  
436 usability Cas13 in live organisms to the best of our knowledge. As such, it is critical to establish  
437 whether Cas13-based technology is suitable for *in vivo* studies. Furthermore, we were interested

438 in creating a system that allows for temporal and spatial control over Cas13 expression. To this  
439 end, we have previously created a *Drosophila* toolkit for CRISPR/Cas9 based on Gateway-  
440 compatible cassettes that allow researchers to insert specific enhancers that drive the expression  
441 of the Cas transgene in a tissue of interest [8,59]. While this generates more upfront work  
442 compared to Gal4/UAS-based systems driving the expression of Cas9 [12,37], it does simplify  
443 the downstream workflow. Also, it reduces unspecific effects since one requires fewer transgenes  
444 to build the necessary fly genotype. We, therefore, decided to create a similar Cas13 toolkit. In  
445 total, we manufactured two general Cas13 vectors, one based on CasFB and one that uses  
446 CasFX, both of which displayed the highest catalytic efficiency in Sg4\_CD cells. For our *in vivo*  
447 strategy, we limited our efforts to constructs that would interfere with RNA expression (Figure  
448 S6A). Based on these all-purpose vectors, we then generated four transgenic lines for further  
449 characterization, named here *act\_CasFB*, *UAS-CasFB*, *act\_CasFX*, *UAS-CasFX* (Figure S6A).  
450 For the generation of crRNAs, we used the previously described multiplexed pCFD5 vector and  
451 implemented changes suitable for Cas13 crRNA processing [12]. We refer to the new plasmids  
452 as i) pC13B, which expresses CasFB-compatible crRNAs under control of the U6:3 promoter  
453 and ii) pC13X, which expresses CasFX-compatible crRNAs under control of the U6:3 promoter  
454 (Figures S6B, C). Both plasmids will ubiquitously express the tRNA:crRNA units. As the tRNA  
455 is processed, its cleavage will result in the release of mature crRNAs that form complexes with  
456 Cas13 enzymes. The cloning procedures for these new crRNA plasmids are overall similar to  
457 those for the pCFD5 vector, but, since some differences exist, we include a detailed protocol in  
458 the supplementary material (see supplemental method S1).

459 To evaluate the efficiency of our transgenic Cas13 constructs *in vivo*, we generated seven  
460 transgenic crRNAs targeting three genes that we study in our lab. This includes *phantom* (*phm*)  
461 and *disembodied* (*dib*), two well-characterized genes involved in ecdysone synthesis in  
462 *Drosophila* [84,85] as well as the third gene, *Iron Regulatory Protein 1A* (*IRPIA*), a gene critical  
463 for cellular iron homeostasis [74,86]. Classic mutants of *phm* and *dib* display embryonic lethality  
464 while *IRPIA* mutant animals die as first instar larvae (L1) [8,59,74,84,87]. In contrast, using PG-  
465 specific somatic CRISPR/Cas9 strategies, *phm*<sup>gR</sup> (gRNA for CRISPR Cas9) caused L1 arrest,  
466 while *dib*<sup>gR</sup> and *IRPIA*<sup>gR</sup> both caused third instar (L3) larval arrest (Figures 6A-C) [8,59,74]. In  
467 addition, PG-specific disruption of *IRPIA* via somatic CRISPR/Cas9 caused a porphyria-like  
468 phenotype due to iron deficiency (Figure 6D) [74].

469 When we crossed the Cas13-compatible crRNAs (referred to as 13B for CasFB-  
470 compatible crRNAs and 13X for CasFX-compatible crRNAs) targeting either *phm*, *dib* or *IRPIA*  
471 with either ubiquitously expressed or PG-specific Cas13 variants, we observed the same  
472 developmental defects we found with our previous strategies (Figures 6A-D, S2, S7, Table S3),  
473 indicating that Cas13 worked effectively in *Drosophila*. The fact that *phm*<sup>13B</sup>, *phm*<sup>13X</sup>, *dib*<sup>13B</sup>, and  
474 *dib*<sup>13X</sup> individuals were rescued to adulthood when reared on 20E-supplemented media [8,59],  
475 and that *IRPIA*<sup>13B</sup>, as well as *IRPIA*<sup>13X</sup> animals, reached adulthood when dietary iron was  
476 provided [74], strongly suggested that the activity Cas13 was highly specific (Figures 6A-C, S7).

477 In addition to the above phenotypic analysis, we evaluated *dib* expression levels via  
478 qPCR. We compared the results to other tissue-specific loss-of-function techniques, including  
479 samples from two independent RNAi lines and samples from one line where we used  
480 transcriptional interference via dead Cas9 (dCas9) to target *dib*. We found that the two RNAi

481 lines reduced *dib* expression by 30-40%, whereas the CRISPRi approach via dCas9 lowered *dib*  
482 expression by 50-60%. Concerning the new Cas13 lines, CasFB reduced *dib* expression by 55-  
483 65%, equivalent to the dCas9 data. Remarkably, CasFX showed the strongest knock-down, and  
484 robustly reduced *dib* expression by 80-90% (Figure 6E). These data indicated that Cas13  
485 transgenes work *in vivo* and may exceed the efficacy of other techniques.

486 We also tested the ability to target multiple transcripts with a single transgene. For this,  
487 we used the pC13X vector and generated a dual-crRNA transgenic line (termed dI<sup>13X</sup>) that  
488 ubiquitously expressed a crRNA targeting *dib* mRNA as well as a crRNA targeting the *IRPIA*  
489 transcript (Figure 6F). Target sites for either of these transcripts were the same as before (Figures  
490 6A, 6C, S2). As expected, the animals arrested development at the L3 stage, similar to targeting  
491 the *dib* and *IRPIA* transcripts individually. Consistent with this, neither 20E- nor iron-  
492 supplementation alone could rescue these double knock-downs, however, a diet supplemented  
493 with both 20E and iron caused a significant rescue to adulthood (Figure 6G). This makes sense  
494 since the two crRNAs interfered with ecdysone production and the regulation of cellular iron  
495 homeostasis. To assess whether the simultaneous knock-down of two genes was as efficient as  
496 targeting these genes individually, we evaluated *dib* and *IRPIA* expression levels via qPCR. We  
497 found no significant difference in any of these approaches suggesting that there is no penalty  
498 when targeting two genes at the same time (Figure 6H).

499

## 500 **Discussion**

### 501 **RNA degradation efficiency of Cas13 in *Drosophila***

502 We evaluated eleven variants of each reported Cas13 ortholog in *Drosophila* Sg4 cells,  
503 including the well-characterized variant from the original studies and ten *Drosophila*-optimized  
504 variants. Among all Cas13 enzymes tested, we observed a wide range of efficiencies, even  
505 between the versions from the same ortholog. Among them, CasRX and its *Drosophila*-  
506 optimized variants CasFX appeared to have the highest efficiency. For the Cas13a and Cas13b  
507 variants, we also identified the optimized variants with reliable efficiency. Even though they  
508 were less efficient than CasFX, these variants may still prove useful in circumstances where only  
509 a moderate knock-down is desired. On the other hand, Cas13c variants did not significantly alter  
510 the expression of target transcripts. We hypothesize that this was caused by several factors: (i)  
511 Cas13c is the least characterized Cas13 enzyme, and it might use a mechanism that differs from  
512 the other Cas13 enzymes. (ii) Even though the low efficiency of Cas13c was in agreement with  
513 previous studies conducted in other species, we cannot rule out the possibility that the Cas13c  
514 variants we used were not ideally suited for *Drosophila*, and (iii) Cas13c might still require a  
515 PFS for optimal activity in the fruit fly. Future studies will need to address this.

516 We noticed that the expression of the PspCas13b and CasRX variants resulted in  
517 considerable toxicity when animals were homozygous for these transgenes, causing lethality  
518 during the first (L1) or second (L2) instar larvae (Figure S8). Interestingly, animals heterozygous  
519 for PspCas13b and CasRX transgenes showed no significant lethality. In contrast, animals  
520 homozygous for our *Drosophila*-optimized Cas13 transgenes, namely CasFB and CasFX,  
521 showed only moderate lethality, with 51% to 58% reaching adulthood, respectively (80-85% is  
522 expected in wild type populations). As expected, animals heterozygous for these transgenes  
523 appeared normal (Figure S8). The lethality of Cas13 transgenic animals was also reported in a



524 recent study [88], similar to the results of early versions of Cas9 in *Drosophila* [8,10]. Since we  
525 observed a wide range of efficiencies between the variants, it is possible that each variant also  
526 exhibits different levels of toxicity. While the reasons for the relatively high lethality of the  
527 original PspCas13b and CasRX constructs (in a homozygous setting) remain unclear, our data  
528 suggest that each variant is unique and that perhaps using codon-optimized versions help to  
529 reduce the toxicity associated with Cas13.

530

### 531 **Beyond RNA cleavage**

532 A few studies have shown that Cas13 may be useful in a broad range of applications, and  
533 not just RNA cleavage. In this study, we have demonstrated that dCasFX can validate RNA-  
534 protein interactions by using an appropriately designed crRNA. We also showed that by adding a  
535 mitochondrial localization sequence, one could recruit the CasFX<sup>mt</sup>/crRNA complex into  
536 mitochondria and target mitochondrial-encoded transcripts. We also adopted the REPAIRv2  
537 system from mammalian cell culture into *Drosophila* Sg4 cells and showed that this system,  
538 FREPAIRv2, can efficiently modify target transcripts with an overall low off-target rate. We  
539 have not tested other potential applications; however, in theory, Cas13 can be modified for many  
540 approaches to study RNA, including splicing, transcript stabilization, or RNA localization.

541 Cas13 may have far-reaching implications for simplifying diagnostics. Recently, the  
542 outbreak COVID-19 caused by SARS-CoV-2 has resulted in a global health threat. To develop a  
543 fast test for COVID-19, the specific high-sensitivity enzymatic reporter unlocking  
544 (SHERLOCK) protocol, a recently developed Cas13-based diagnostic test for infectious  
545 diseases, can detect the virus in 50 min [89,90] (<https://mcgovern.mit.edu/2020/02/14/enabling->

546 coronavirus-detection-using-crispr-cas13-an-open-access-sherlock-research-protocol/). In an  
547 independent study, CRISPR/Cas13 was also used to detect SARS-CoV-2 [91]. Together, these  
548 studies demonstrate the enormous potential of Cas13 as a diagnostic and therapeutic tool.

549

### 550 **From *in vitro* to *in vivo***

551 A significant part of the work presented here was based on cell culture experiments.  
552 These approaches were ideal to economically evaluate the efficiencies of multiple Cas13  
553 versions in *Drosophila*. However, our ultimate goal is to establish CRISPR/Cas13 approaches for  
554 *in vivo* studies in model organisms, which has not been accomplished yet. Based on our results of  
555 transgenic CRISPR/Cas13 flies, CasFX and CasFB can efficiently target and cleave transcripts  
556 of interest *in vivo*, and as such, represent a compelling alternative to existing methods. This study  
557 may also help scientists working with other model organisms to optimize their approach for  
558 implementing Cas13 *in vivo*.

559

### 560 **The CRISPR/Cas13-based toolkit**

561 This study has generated two collections of Cas13/crRNA toolkits to study in either cell  
562 culture or organisms. For the cell culture toolkit, we have produced the pC13cr01 vectors, which  
563 allow the co-transfection of Cas13 variants and the crRNA corresponding to the target transcript.  
564 With this vector, one only needs to digest the crRNA backbone with the BbsI enzyme and clone  
565 the target site for the crRNA, similar to the generation of the Cas9-compatible gRNA system in  
566 pCFD5 or pCFD6 plasmids. For *in vivo* work, we also established a similar system with Cas13  
567 transgenes already available from our study. Researchers will need to generate their crRNAs

568 against the target transcript. For this, we provide the pC13B and pC13D vectors with the same  
569 cloning procedure as pCFD5. We also provided a supplemental method section with a detailed  
570 description of the cloning procedures. On the other hand, the UAS-based versions of Cas13  
571 transgenes will also allow scientists to spatially and temporally manipulate Cas13 activity and  
572 study transcript of interest at desired tissues.

573

## 574 **Conclusions**

575 Just like CRISPR/Cas9 allows for the manipulation of DNA, Cas13 enables us to target  
576 any transcript of interest. This is beneficial for approaches where researchers do not want to alter  
577 the DNA of the gene of interest, since Cas13 controls gene expression on the RNA level, similar  
578 to RNAi. Furthermore, current evidence suggests that Cas13, especially variants from the  
579 Cas13d family, display minimal off-target tendencies, and this might help quell concerns  
580 regarding RNA targeting. Even though it might be too early to make conclusions about the off-  
581 target activity of Cas13, we believe that its high specificity holds excellent promise for future  
582 applications. Also, the ability to modify Cas13, such as targeting Cas13 to mitochondria, further  
583 expands the range of future applications for this methodology.

584

## 585 **Methods**

### 586 Generation of *Drosophila* optimized Cas13 orthologs (DmCas13)

587 To generate fruit fly codon-optimized Cas13 variants, the original Cas13 nucleotide  
588 sequences were evaluated by using two independent web tools: i) ATGme (<https://atgme.org>)  
589 and ii) OPTIMIZER (<http://genomes.urv.es/OPTIMIZER>) [92,93] with the customized codon

590 usage frequency specific for *Drosophila* [94–96]. The two indices, namely the Codon Adaption  
591 Index (CAI) and the Effective Number of Codons (ENC) were used to obtain the optimized  
592 sequences. CAI has value ranges from 0 to 1 and is used to evaluate the similarity between codon  
593 usage of a gene and codon usage of the reference group [97]. Thus, at least in theory, the higher  
594 the CAI value, the higher is gene expression [98,99]. On the other hand, ENC is a measure of  
595 codon usage bias with values between 20 and 61. Since the expression of a gene is usually  
596 dependent on the availability of tRNA species, one would expect that genes with higher  
597 expression will use a smaller subset of codons recognized by the most abundant tRNAs, resulting  
598 in lower ENC values [100]. Taking these two factors into consideration, we picked the top 10  
599 variants per Cas13 subtype for further investigation (Table S1). We reasoned that it would not  
600 suffice just to choose the top-scoring variant, and therefore, we also selected other high-scoring  
601 sequences. We generated the selected variants via a combination of mutagenesis of the original  
602 Cas13 sequences and fusing gBlocks gene fragments from Integrated DNA Technologies (IDT)  
603 (Table S4).

604

#### 605 Design and generation of target crRNAs

606 The very first Cas13 proteins that were characterized in bacteria required a sequence  
607 constraint, the PFS, to ensure target cleavage efficiency. This includes *Leptotrichia shahii*  
608 Cas13a (LshCas13a), *Bergeyella zoohelcum* Cas13b (BzoCas13b) and *Prevotella buccae* Cas13b  
609 (PspCas13b) [50,53]. However, further investigation of PspCas13b in mammalian and plant and  
610 other Cas13 orthologs showed high target RNA degradation efficiencies even in the absence of  
611 PFS [23,46,49,52]. While this gives researchers some flexibility over target site selection, it is

612 necessary to consider the secondary structure of target transcripts, since this negatively affected  
613 knock-down efficiency [23,50]. To assess secondary structures, we used two independent online  
614 tools, namely RNAfold (<http://rna.tbi.univie.ac.at/cgi-bin/RNAWebSuite/RNAfold.cgi>) and  
615 RNA structure  
616 (<https://rna.urmc.rochester.edu/RNAstructureWeb/Servers/Predict1/Predict1.html>) [101–104].  
617 Besides, we also used the siRNA design tool RNAXs (<http://rna.tbi.univie.ac.at/cgi->  
618 [bin/RNAXs/RNAXs.cgi](http://rna.tbi.univie.ac.at/cgi-bin/RNAXs/RNAXs.cgi)) to find the regions of transcripts with good accessibility to narrow down  
619 the target region space for designing gRNAs [105]. For the case of Cas13a orthologs, we  
620 compared the target sequences with the online CRISPR-RT tool  
621 (<http://bioinfolab.miamioh.edu/CRISPR-RT/interface/C2c2.php>) [106]. The crRNA cassette was  
622 amplified and cloned into a pre-digested expression vector backbone via the Gibson reaction. All  
623 crRNAs used in this study were driven by the *Drosophila* U6:3 promoter (dU6:3). For more  
624 information regarding crRNA cloning, see supplement method S1.

625

#### 626 Generation of transfection plasmids

627 For a list of plasmids, we generated for this study, see supplemental table S2. The  
628 original plasmids we used for this project were obtained from Addgene: pCFD3 (#49410),  
629 pCFD5 (#73914), pACG:eCFP (#32597), pDsRed-attP (#51019), Ac5-Stable2-Neo (#32426),  
630 pC0056-LwaCas13a-msfGFP-NES (#105815), pC0040-LwaCas13a crRNA backbone  
631 (#103851), pC0046-EF1a-PspCas13b-NES-HIV (#103862), pC0043-PspCas13b crRNA  
632 backbone (#103854), pC0054-CMV-dPspCas13b-longlinker-ADAR2DD (E488Q/T375G)  
633 (103870), pXR001: EF1-CasRX-2A-eGFP (#109049), pXR004: CasRX pre-gRNA cloning

634 backbone (#109054), pBID-UASc (#35200), [10,12,23,35,46,50,107–110]. We also obtained  
635 plasmids from the *Drosophila* Genetic Resource Center (DGRC): pAFW (#1111), pAHW  
636 (#1095), act-PhiC31-integrase (#1368). We also used plasmids we previously generated,  
637 enDmC, to generate some constructs for this study [8]. pMT-Gal4-puro plasmid was a kind gift  
638 from Christoph Metzendorf (University of Uppsala). All fragments used for the cloning step  
639 were amplified via PCR using Q5 high fidelity DNA polymerase (NEB #M0491S) (table S4) and  
640 fused together via Gibson assembly reaction [111].

641

#### 642 Generation of transgenic cell lines

643 The original Sg4-PP-27F (#238) cell culture line was obtained from *Drosophila* Genetics  
644 Resource Center (DGRC) and grown in the HyClone SFM4 Insect cell culture (SFM4) medium  
645 (GE Lifesciences SH30913.02) with 1% (v/v) Streptomycin-Penicillin (Sigma P4333) following  
646 standard procedures (Invitrogen). To generate the transgenic Sg4\_CD cell line, Sg4-PP-27F cells  
647 were co-transfected with two different plasmids, where one plasmid contained the PhiC31  
648 integrase gene, and the other was the dual-reporter plasmid (Figure S1A). The dual-reporter  
649 transgenic construct also contained a *Neo<sup>R</sup>* gene, which allows for resistance to Geneticin G418  
650 (Sigma 4727878001). 48-72 hours after co-transfection, cells were washed and grown in SFM4  
651 medium supplemented with G418 at the final concentration of 200 µg/ml. Transfected cells were  
652 maintained on this type of medium (SFM4 with 1% Streptomycin-Penicillin and 200 µg/ml  
653 G418) for at least four passage rounds before being tested for the integration of transgenic  
654 constructs via Sanger sequencing.

655

656 DNA extraction from cells

657 Cells were grown, and DNA was extracted as previously described [59]. In brief, cells  
658 were collected as pellets and filled with 20  $\mu$ l of DNA extraction buffer (10 mM Tris-HCl pH  
659 8.2, 25 mM NaCl, 1 mM EDTA pH 8.0, 0.2% v/v Triton X-100, 1x proteinase K (AM2546)).  
660 The mixture was vortex for 3x 30s and incubated at 37°C for 30 minutes before heat-inactivated  
661 at 95°C for 5 minutes. Cell lysates were centrifuged at 12,000 x g at 4°C for 5 minutes, and the  
662 supernatant was transferred to a new collection tube. 1  $\mu$ l of supernatant was used for PCR  
663 amplification at the genomic region spanning target sites. PCR products were purified using the  
664 HighPrep<sup>TM</sup> PCR reagent from MagBio (AC-60005) following the manufacturer's protocol.

665

666 Cell culture transfection

667 Cells were grown in SFM4 medium with 1% streptomycin-penicillin, 200  $\mu$ g/ml G418,  
668 and transfected by the Calcium Phosphate-based method (Invitrogen). To study the effects of  
669 different Cas13 variants, puromycin was added to medium on the second day after transfection at  
670 the final concentration of 5  $\mu$ g/ml, similar to what was previously used [112,113]. Cells were  
671 collected seven days after transfection to ensure the turnover of already translated eCFP  
672 polypeptides [114]. Transfected cells were washed in ice-cold 1x PBS for 3x 5 min and collected  
673 for later experiments.

674

675 Cell immunostaining

676 On the first day of the transfection experiment, coverslips were pre-cleaned in 70%  
677 ethanol and placed into a transfection plate (Sigma CLS3516). Cells were then seeded and

678 transfected following the standard procedures (Invitrogen). This allows cells to adhere to the  
679 coverslips for subsequent immunostaining. Subsequent transfection procedures were carried out  
680 as described in the cell culture transfection section. Seven days after transfection, coverslips  
681 were transferred to a clean transfection plate for immunostaining, while cells in the supernatants  
682 were collected for cell lysis and protein extraction.

683 Samples were fixed in 1x PBS 4% formaldehyde (ThermoFisher #28906) for 15 min at  
684 room temperature (RT) with gentle shaking followed by washing in 1x PBS 0.3% Triton (Sigma  
685 #T9284) (PBS3T) for 3x 10 min. Samples were blocked at RT for 30 min in blocking solution  
686 (1x PBS3T 5% normal goat serum (Abcam ab138478)) and incubated in primary antibody  
687 dilution buffer (antibody diluted in 1x PBS3T and 1% BSA) for 1 hour at RT. Samples were then  
688 washed in 1x PBS3T for three times with 10 min each, incubated in secondary antibody dilution  
689 buffer for 1 hour at RT, and then washed in 1x PBS3T with either 1:50,000 DAPI (Cell  
690 Signaling #4083) or 1:2,000 Nuclear Green DCS1 (Abcam ab138905) for 3x 10 min. Samples  
691 were mounted in Vectashield mounting medium (#VECTH1000). Pictures were taken on Nikon  
692 Eclipse 80i Confocal C2+ microscope/camera. We used the following reagents: a monoclonal  
693 mouse anti-HA-tag antibody (Abcam ab18181) at the ratio of 1:1000 for 3xHA tagged Cas13  
694 orthologs, mitotracker green (Cell signaling 9074S) at the concentration of 400n M for staining  
695 mitochondria, monoclonal mouse anti-MTCO1 (Abcam ab14705) at the ratio of 1:2000 and  
696 monoclonal rabbit anti-MTCO2 (Abcam ab79793). Secondary antibodies were obtained from  
697 Abcam and used at the ratio of 1:2000 ratio, including goat anti-mouse IgG H&L Alexa Fluor  
698 488 (ab150113), goat anti-mouse IgG H&L Alexa Fluor 555 (ab150114), goat anti-rabbit IgG  
699 H&L Alexa Fluor 555 (ab150078). eCFP and DsRed signals were captured based on their



700 fluorescence properties without antibody staining. For quantification of the eCFP signal, the  
701 mean pixel values of the images were analyzed using ImageJ as the corrected total cell  
702 fluorescence (CTCF) following the formula:  $CTCF = \text{selected cell intensity} - (\text{area of the chosen}$   
703  $\text{cell} * \text{background intensity})$ . The CTCF values were averaged from all biological replicates and  
704 normalized to the normalized average CTCF values of no-targeting (NT) crRNA samples.

705

#### 706 Western blotting of cell extracts

707 For cell lysis and western blotting, 7-day post-transfection cells were collected by  
708 centrifugation at 1,000 x g for 10 min at 4°C and supernatant was removed as much as possible.  
709 Cells were washed in ice-cold 1x PBS for 3 x 10 minutes and lysed in 90 µl lysis buffer (1x PBS,  
710 1% Triton, 1x proteinase K inhibitor) by vortexing for 15 seconds every 10 min for up to 1 hour.  
711 Cell lysate was mixed with fresh 4x Laemmli buffer (0.25 M Tris pH 6.8, 8% SDS, 40%  
712 Glycerol, 25% β-mercaptoethanol, 0.2% bromophenol blue) at the ratio of 3:1 (v/v). 40 µl of the  
713 mixture (1/3 total volume) was loaded on 12.5% SDS gel. Later steps, including gel  
714 electrophoresis and western blotting, were carried out following the manufacturer's (Abcam)  
715 instructions. To detect eCFP, monoclonal rabbit anti-GFP-tag antibodies (Invitrogen G10362)  
716 were used at a ratio of 1:1000, followed by incubation with a goat anti-rabbit IgG H&L HRP  
717 secondary antibody (Abcam ab97051) at a ratio of 1:20,000. To detect DsRed, monoclonal  
718 mouse anti-DsRed antibody (Santa Cruz sc-390909) was detected at the ratio of 1:1000, followed  
719 by incubation with a goat anti-mouse IgG H&L HRP secondary antibody (Abcam ab97023) at  
720 the ratio of 1:20,000. To detect COXI and COXII, monoclonal mouse anti-MTCO1 antibody  
721 (Abcam ab14705) and monoclonal rabbit anti-MTCO2 antibody (Abcam ab79393), respectively,

722 were used at a ratio of 1:500. To detect tubulin, which served as a loading control, monoclonal  
723 mouse anti- $\beta$ -tubulin antibodies (Sigma 05-661) were used at the ratio of 1:10,000. Blots were  
724 scanned for image acquisition with a ChemiDoc imaging system (Bio-Rad), and bands intensity  
725 was measured using ImageJ.

726

#### 727 Nuclease-dead dCasFX-IRP1A<sup>C450S</sup> co-immunoprecipitation

728 The dCasFX/crRNA complex and IRP1A<sup>C450S</sup>/Fer1HCH RA cDNA was transfected  
729 independently. In one sample, dCasFX and the crRNA corresponding to the Fer1HCH-RA  
730 transcript were cloned into the same plasmid pC13cr01 (Figure S1D), while in another approach,  
731 IRP1A<sup>C450S</sup> and Fer1HCH RA cDNA were similarly cloned into the same plasmid as pC13cr01.  
732 IRP1A<sup>C450S</sup>/Fer1HCH-RA co-transfection was carried out at a 10x higher ratio compared to each  
733 dCasFX/crRNA transfection alone. Transfected samples were lysed using 200  $\mu$ l lysis buffer (1x  
734 PBS, 1% Triton, 1x proteinase K inhibitor) by vortexing for 15 seconds every 10 min for up to 1  
735 hour. Lysates of samples transfected with IRP1A<sup>C450S</sup>/Fer1HCH-RA were combined and evenly  
736 distributed among ten groups of dCasFX/crRNA lysate. This ensured that each lysate had a  
737 similar amount of IRP1A<sup>C450S</sup>/Fer1HCH-RA complex. The mixed lysate was incubated with pre-  
738 crosslinked HA Dynabeads protein G (Invitrogen 10004D) following the manufacturer's  
739 directions. Samples were eluted in 4x Laemmli buffer (0.25 M Tris pH 6.8, 8% SDS, 40%  
740 Glycerol, 25%  $\beta$ -mercaptoethanol, 0.2% bromophenol blue).

741

#### 742 Drosophila stocks and husbandry

743 We obtained the following stocks from the Bloomington *Drosophila* Stock Center:  $w^{1118}$   
744 (#3605),  $dib^2/TM3 Sb^1$  (#2776),  $phm^{E7}/FM7c$  (#2208),  $y^1 v^1 P[nos-PhiC31.NLS]X; attP40(II)$   
745 (#25709),  $y^1 v^1 P[nos-PhiC31/int.NLS]X; attP2(III)$  (#25710). Stocks *UAS-dib*-RNAi (1)  
746 (#101117), *UAS-dib*-RNAi (2) (#16827), *UAS-phm*-RNAi (#108359) were obtained from the  
747 Vienna *Drosophila* Resource Center.  $y^2 cho^2 v^1$  (TBX-0004),  $y^2 cho^2 v^1; sco/CyO$  (TBX-0007),  
748  $y^2 cho^2 v^1/Y^{hs-hid}$ ;  $Sp/CyO$  (TBX-0008),  $y^2 cho^2 v^1; Sp hs-hid/CyO$  (TBX-0009),  $y^2 cho^2 v^1; Pr$   
749  $Dr/TM6C, Sb Tb$  (TBX-0010) were obtained from the National Institute of Genetics of Japan  
750 (NIG). *act\_DmCas13B/CyO GFP*, *UAS-DmCas13B*, *act\_DmCasRX/CyO GFP*, *UAS-DmCasRX*,  
751  $y^1 v^1; P[pCFD5 dib.KO dgRNA]attP40$  (dU6-dib<sup>gR13B</sup>),  $y^1 v^1; P[pCFD5 dib.KO dgRNA]attP40$   
752 (dU6-dib<sup>gR13D</sup>),  $y^1 v^1; P[pCFD5 dib.KO dgRNA]attP40$  (dU6-phm<sup>gR13B</sup>),  $y^1 v^1; P[pCFD5 dib.KO$   
753  $dgRNA]attP40$  (dU6-phm<sup>gR13D</sup>),  $y^1 v^1; P[pCFD5 dib.KO dgRNA]attP40$  (dU6-IRP1A<sup>gR13B</sup>),  
754  $y^1 v^1; P[pCFD5 dib.KO dgRNA]attP40$  (dU6-IRP1A<sup>gR13D</sup>) were generated by our lab.  
755 *spok\_DmC/TM3, Ser.GFP* (*spok\_DmC*),  $y^1 v^1; P[pCFD5 dib.KO dgRNA]attP40$  (dU6-dib<sup>gR1</sup>),  
756  $y^1 v^1; P[pCFD5 dib.KO dgRNA]attP40$  (dib TSS<sup>-110</sup>),  $y^1 v^1; P[pCFD5 dib.KO dgRNA]attP40$   
757 (dU6-phm<sup>gR1</sup>),  $P[pCFD5 dib.KO dgRNA]attP40$  (dU6-IRP1A<sup>gR</sup>), *IRP1A<sup>KO</sup>/TM6B, Hu, Tb* were  
758 previously generated by our lab [8,74].  $y^1 w^* P[nos-PhiC31.NLS]X; attP40(II)$  and  $y^1 w^* P[nos-$   
759  $PhiC31/int.NLS]X; attP2(III)$  were gifts from the BestGene Inc. *phm22-Gal4* was a kind gift  
760 from Michael O'Connor's lab. Stocks were maintained on a cornmeal diet unless otherwise  
761 specified.

762

763 Survival studies

764 Experiments were carried out as previously described [8,59,74]. In brief, 50 embryos per  
765 replicate were collected in 1-hour intervals and transferred to vials containing appropriate media.  
766 Larval survival was scored for every stage. At least three independent crosses (= three biological  
767 replicates) were carried out per experimental condition. Modified media were prepared by  
768 adding compounds (e.g., iron or 20E) during the preparation process. For iron-enriched media, a  
769 1 M stock solution of Ferric Ammonium Citrate (FAC) (Sigma #F5879) was used to make a  
770 medium with a final concentration of 1mM FAC. For 20-Hydroxyecdysone (20E)-supplemented  
771 media, the final concentration was 0.33 mg/ml. For *dib*<sup>2</sup>, *phm*<sup>E7</sup> mutants or transgenic lines that  
772 ubiquitously knock-down *dib* or *phm*, fresh embryos were immersed for 5 min in 1xPBS  
773 containing 20E at the final concentration of 0.11 mg/ml [59]. Survival rates were normalized to  
774 the number of embryos used per replicate. Error bars represent standard deviation (data is  
775 normally distributed).

776

#### 777 Embryo injection

778 PhiC31 constructs were injected at 500-600 ng/μl concentrations. Injections were  
779 performed either at the University of Alberta or Da Lat University using standard procedures  
780 [115]. 300-500 embryos were injected per construct. Surviving adults were backcrossed to *w*<sup>1118</sup>  
781 (for Cas13 transgenes) or *y*<sup>2</sup>*cho*<sup>2</sup>*v*<sup>1</sup> (for crRNA transgenes) and used to generate independent  
782 lines.

783

#### 784 Quantitative real-time PCR (qPCR)

785           Studies were performed as previously described [8,74]. The extracted RNA (Qiagen  
786 RNeasy extraction kit) was reverse-transcribed via the ABI High Capacity cDNA synthesis kit  
787 (ThermoFisher #4368814). Synthesized cDNA was used for qPCR (QuantStudio 6 Flex) using  
788 KAPA SYBR Fast qPCR master mix #Sigma KK4601). For each condition, three biological  
789 samples were each tested in triplicate. Samples were normalized to *rp49* based on the  $\Delta\Delta CT$   
790 method. Error bars represent 95% confidence intervals.

791

#### 792 Statistical analysis

793           For the survival studies, survival rates were normalized to the starting number of embryos  
794 (50 embryos per replicate). Error bars represent standard deviation (data is normally distributed).  
795 In the FREPAIRv2 editing experiment, the editing rate was calculated as the percentage of  
796 samples with correct modification out of the total number of sequenced samples. The off-target  
797 rate represents the percentage of samples with incorrect modifications out of the total number of  
798 sequenced samples. Error bars represent standard deviation (data is normally distributed). In  
799 qPCR reactions, samples were normalized to *rp49*, a housekeeping gene, and based on the  $\Delta\Delta CT$   
800 method [116], error bars represent 95% confidence intervals and contain the error for the  
801 calibrator (which is shown without error bars). For multiple comparisons to the same control, we  
802 used one-way ANOVA, followed by Dunnett's test. For multiple pair-wise comparisons (in the  
803 RNA immunoprecipitation experiments), we applied one-way ANOVA coupled with Tukey's  
804 HSD (HSD = honestly significant difference) test. At least three biological samples and three  
805 technical replicates were analysed per condition. For quantification of the eCFP signal in  
806 immunostains or western blots, the mean pixel values of the images were analyzed using ImageJ

807 as the corrected total cell fluorescence (CTCF) using the formula:  $CTCF = \text{selected cell intensity}$   
808  $- (\text{area of the chosen cell} * \text{background intensity})$ . The CTCF values were averaged from all  
809 biological replicates and normalized to the average CTCF values of no-targeting (NT) crRNA  
810 samples. Graphs, standard error calculations, t-tests, Dunnett's tests, and Tukey HSD were  
811 conducted in Microsoft Excel, SPSS (IBM), and Prism 8 (GraphPad). All data were normally  
812 distributed.

813

814

815

816 **Abbreviations**

|     |               |                                                         |
|-----|---------------|---------------------------------------------------------|
| 817 | 20E           | 20-hydroxyecdysone                                      |
| 818 | ADAR2         | Adenosine Deaminase Acting on RNA 2                     |
| 819 | Cas           | CRISPR-associated proteins                              |
| 820 | CasRX         | <i>Ruminococcus flavefaciens</i> XPD3002 Cas13d         |
| 821 | CoIP          | coimmunoprecipitation                                   |
| 822 | CRISPR        | cluster regularly interspaced short palindromic repeats |
| 823 | crRNA         | CRISPR RNA                                              |
| 824 | dCas9         | nuclease-dead Cas9                                      |
| 825 | <i>dib</i>    | <i>disembodied</i>                                      |
| 826 | dU6:3         | <i>Drosophila</i> U6:3 promoter                         |
| 827 | eCFP          | enhanced cyan fluorescent protein                       |
| 828 | ENC           | effective number of codons                              |
| 829 | gRNA          | guide RNA                                               |
| 830 | IRE           | iron-responsive element                                 |
| 831 | IRP           | iron regulatory protein                                 |
| 832 | L1            | first instar larvae                                     |
| 833 | L2            | second instar larvae                                    |
| 834 | L3            | third instar larvae                                     |
| 835 | LshCas13a     | <i>Leptotrichia shashii</i> Cas13a                      |
| 836 | LwaCas13a     | <i>Leptotrichia wadei</i> Cas13a                        |
| 837 | <i>mt:CoI</i> | <i>mitochondrial cytochrome c oxidase subunit I</i>     |

|     |                |                                                        |
|-----|----------------|--------------------------------------------------------|
| 838 | <i>mt:CoII</i> | <i>mitochondrial cytochrome c oxidase subunit II</i>   |
| 839 | mtDNA          | mitochondrial DNA                                      |
| 840 | NES            | nuclear export signal                                  |
| 841 | NLS            | nuclear localization signal                            |
| 842 | NT             | non-targeting                                          |
| 843 | PspCas13b      | <i>Prevotella buccae</i> Cas13b                        |
| 844 | RNAi           | RNA interference                                       |
| 845 | SHERLOCK       | specific high-sensitivity enzymatic reporter unlocking |

846

847 **Declaration**

848 Ethics approval and consent to participate

849 Experiments in this study were conducted in *Drosophila* cells and live organisms  
850 following standard protocols. No human samples were used. No ethics approval is required in  
851 this study.

852

853 Consent for publication

854 All authors participated in this study have been notified about the preparation and  
855 submission of the manuscript. Data generated by each author have been collected and used for  
856 the preparation of this manuscript.

857

858



859 Availability of data and materials

860           The datasets supporting the conclusions of this article are available in the Source Data  
861 file at Figshare repository (<https://figshare.com/s/ec49a9766bffb1bfe712>) with DOI information  
862 <https://doi.org/10.6084/m9.figshare.12702317>. The pC13cr01 vector collection for cell culture  
863 work, p13X and p13B vectors for generating *in vivo* crRNA transgenes have been deposited at  
864 the *Drosophila* Genetic Resource Center (DGRC) and tentatively scheduled to be available in  
865 December 2020. Fly strains carrying CasFB and CasFX will be available at the Bloomington  
866 *Drosophila* Stock Center starting January 2021 as a part of the National Institute of Health  
867 project (NIH P40ODO18537). Import permit for cell lines Sg4\_CD and Sg4\* has been obtained  
868 and the live stocks will be sent to DGRC in October 2020. Fly strains, plasmids, and cell lines  
869 can also be obtained from our lab upon request.

870

871 Competing interests

872           The authors declare no competing interests.

873

874 Funding

875           This work was supported by the Natural Sciences and Engineering Research Council of  
876 Canada (NSERC #RGPIN-2018-04357) and the Canadian Institute for Health Research (CIHR  
877 #PS 169196).

878

879

880 Author Contributions

881 N.H. co-designed & carried out most of the experiments, and wrote the manuscript. N.D.  
882 generated parts of the pC13cr01 plasmids used for cell culture. R.L. assisted with the generation  
883 of Cas13 transgenes. K.K.J. acquired funding, supervised trainees, co-designed experiments, and  
884 revised the manuscript.

885

886 Acknowledgments

887 We thank Norbert Perrimon, Simon Bullock, Gerald Rubin, Feng Zhang, Christoph  
888 Metzendorf, Kate O'Connor, James D. Sutherland, Andrew Simmonds, and Patrick Hsu for  
889 sharing the original plasmids used in this study. Some stocks used in this study were obtained  
890 from the Bloomington *Drosophila* Stock Center (NIH P40ODO18537), the Vienna *Drosophila*  
891 Resource Center, the Japan National Institute of Genetics. This work was supported by the  
892 Natural Sciences and Engineering Research Council of Canada (NSERC #RGPIN-2018-04357)  
893 and the Canadian Institute for Health Research (CIHR #PS 169196).

894

895

896 **Figure legends**

897

898 **Figure 1: Functional overview of CRISPR/Cas9 and CRISPR/Cas13 systems.** (A) Schematic  
899 of Cas9 mechanism in genome editing. This system requires the recruitment of CRISPR-  
900 associated protein Cas9 (blue) to the target site recognized by the guide RNA (gRNA: orange).  
901 Target site cleavage by Cas9 is ensured by the presence of the protospacer adjacent motif (PAM)  
902 (green), a sequence that immediately follows the target site. The PAM will determine the Cas9  
903 cleavage site, which lies about three nucleotides upstream of the PAM. (B) Schematic of the  
904 Cas13 RNA cleavage mechanism. This system requires the pre-assembly of Cas13 (green) with  
905 the CRISPR RNA (crRNA: red) to recognize target RNAs. Upon RNA-binding, Cas13 will  
906 undergo a conformational change and induce the catalytic activity of its nuclease domains,  
907 resulting in the cleavage of target transcripts. (C) Comparisons of Cas9 size with different Cas13  
908 subtypes (a-d). Polypeptide sizes are indicated as the number of amino acids. (D) Relative  
909 structural representation of different Cas13 subtype-compatible crRNAs. All four subtype  
910 crRNAs carry a direct repeat to facilitate the binding with their corresponding Cas13 enzyme, as  
911 well as a spacer sequence specific for the target transcript. Cas13b-compatible crRNAs carry a  
912 direct repeat at the 3'-end while compatible crRNAs for Cas13a, c, and d carry the direct repeat  
913 at the 5'-end.

914

915 **Figure 2: Efficiency evaluation of *Drosophila* codon-optimized Cas13 variants.** (A-D) qPCR  
916 analysis showing eCFP transcript levels in Sg4 cells as a function of the different Cas13 variants  
917 that were expressed in these cells (a-d, respectively). Shown are relative fold changes of eCFP

918 transcript being targeted by two independent crRNAs, crRNA 1 (red) and crRNA 2 (green). Data  
919 were normalized to eCFP expression levels when using a blank crRNA as a control (blue dotted  
920 line = 1). \* = p-value < 0.05, \*\* = p-value < 0.01, \*\*\* = p-value < 0.001, ns= not significant, p-  
921 values based on Student's t-test, error bars represent 95% confidence intervals. **(E)** Fluorescence  
922 changes of eCFP across samples targeted by the Cas13/crRNA 2 complex. Fluorescence levels  
923 were measured using ImageJ and normalized to signals obtained with a blank crRNA (control).  
924 Nuclei were stained with Nuclear Green LCS1 (ab138904). eCFP and DsRed fluorescence were  
925 measured using their native fluorescence properties (no antibody staining). Scale bar = 50  $\mu$ m.

926

927 **Figure 3: Specificity evaluation of *Drosophila* codon-optimized Cas13 variants in Sg4 cells.**

928 **(A-F)** Relative expression levels of eCFP when using different Cas13 variants and crRNAs that  
929 carry a range of single mismatches along the eCFP crRNA-2. Data were normalized to samples  
930 treated with a blank crRNA (control = C). eCFP expression levels in Cas13/ wild-type (WT)  
931 crRNA samples were also included as a reference. \* = p-value < 0.05, \*\* = p-value < 0.01, \*\*\* =  
932 p-value < 0.001, ns= not significant, p-values based on Dunnett's *post-hoc* test, error bars  
933 represent 95% confidence intervals.

934

935 **Figure 4: Properties of modified Cas13 variants. (A)** Schematic of nuclease-dead CasFX

936 (dCasFX) activity. dCasFX carries quadruple point mutations that abolish its nuclease activity.

937 As a result, the dCasFX/crRNA complex can be recruited and bind to target transcripts, but it

938 cannot cleave the RNA. **(B)** Evaluation of Cas13 cleavage efficiency of dCasFX compared to

939 wild-type CasFX. qPCR data represent expression levels of eCFP. Data were normalized to

940 samples treated with blank crRNA (control). \* = p-value < 0.05, \*\* = p-value < 0.01, \*\*\* = p-  
941 value < 0.001, p-values based on Student's t-test, error bars represent 95% confidence intervals.

942 (C) eCFP fluorescence when targeted by either CasFX or dCasFX. Nuclei were stained with  
943 nuclear green DCS1 (Abcam ab138904). eCFP and DsRed fluorescence were measured using  
944 their native fluorescence property without using antibody staining. Scale bar = 50  $\mu\text{m}$ . (D)  
945 Schematic of dCasFX for the validation of RNA-protein interactions. dCasFX and crRNA  
946 targeting *Fer1HCH-RA* mRNA were transfected together in one sample. *Fer1HCH-RA* and  
947 IRP1A<sup>C450S</sup>, a constitutively RNA-binding form of IRP1A that interacts with the iron-responsive  
948 element (IRE) in the *Fer1HCH-RA* mRNA, were transformed together in a different sample. The  
949 two samples were each lysed and combined, followed by immunoprecipitation (IP) of dCasFX  
950 (utilizing the attached HA tag) to test for the presence of IRP1A in the pull-down assay. (E)  
951 Western blot showing the IP of dCasFX combined with different crRNAs along *Fer1HCH-RA*  
952 mRNA and the detection of IRP1A in corresponding samples. (F) Functional schematic of  
953 CasFX that carries a mitochondrial localization signal (CasFX<sup>mt</sup>). At the N terminus, CasFX<sup>mt</sup> is  
954 fused with the *tim23* mitochondrial signal sequence. Upon binding with crRNA, the complex  
955 will localize into mitochondria and target mitochondrial-encoded transcripts. (G) Mitochondrial  
956 localization of CasFX<sup>mt</sup>. Nuclei were stained with DAPI (blue) while mitochondria were stained  
957 with mitotracker green (Cell signaling 9074S) and CasFX polypeptide was stained with anti-HA  
958 antibody (red). Scale bar = 25  $\mu\text{m}$ . (H) The relative expression level of mitochondrial-encoded  
959 transcripts, *COXI* and *COXII*, targeted by RNAi, CasFX<sup>O</sup>, and CasFX<sup>mt</sup>. Data were normalized  
960 to samples treated with no transfected plasmid (control). \* = p-value < 0.05, \*\* = p-value < 0.01,  
961 \*\*\* = p-value < 0.001, ns = not significant, p-values based on Dunnett's *post-hoc* test, error bars

962 represent 95% confidence intervals. **(I)** Western blotting of COXI and COXII when being  
963 targeted by RNAi, CasFX<sup>O</sup>, and CasFX<sup>mt</sup>.

964

965 **Figure 5: Adaptation of the REPAIRv2 system to modify RNA in *Drosophila* Sg4 cell**

966 **culture. (A)** Schematic for the *Drosophila*-modified REPAIRv2 system (FREPAIRv2), to

967 modify a mutant eCFP transcript. Mutant eCFP carries an early stop codon that normally

968 encodes Tryptophan at residue 57 (W57\*). By generating an A to C mismatch in the crRNA

969 spacer that corresponds to the stop codon, the ADAR2<sub>DD</sub> domain will change the equivalent

970 adenosine (A) to inosine (I). Inosine will be treated as guanosine by the translation machinery.

971 **(B)** Schematic of FREPAIRv2 outcome. Originally, the mutant eCFP transcript harbors a stop

972 codon at position 57, which will generate a short polypeptide with 56 amino acids. However,

973 once modified by FREPAIRv2, codon 57 will be reverted to wild-type tryptophan, and restore

974 the production of a full-length polypeptide. **(C)** Western blotting monitoring eCFP productions

975 relative to transfection time. **(D)** Fluorescence emitted by eCFP relative to transfection time.

976 Nuclei were stained with nuclear green DCS1 (Abcam ab138905). eCFP and DsRed

977 fluorescence were measured based on their natively emitted fluorescence. Scale bar = 50  $\mu$ m. **(E)**

978 Schematic of crRNAs that we used for FREPAIRv2. We considered two criteria for the crRNA

979 design: i) mismatch distance from the first nucleotide and ii) spacer length. **(F)** Editing rate and

980 off-target rate of FREPAIRv2 concerning mismatch distance when spacer length was kept at a

981 constant 50 nucleotides. Error bars represent standard deviation. **(G)** Editing rate and off-target

982 rates of FREPAIRv2 in relation to spacer lengths when the mismatch distance was kept at the

983 constant position 26. Error bars represent standard deviation.

984

985 **Figure 6: Efficiency of *Drosophila* codon-optimized CRISPR/Cas13 *in vivo*.** (A) Comparison

986 of phenotypes from a classic *disembodied* mutant (*dib*<sup>2</sup>), ubiquitous knock-down of *dib* via

987 CasFB/*dib*<sup>13B</sup>, CasFX/*dib*<sup>13X</sup>, prothoracic gland-specific manipulation via CRISPR/Cas9, or

988 Cas13 of *dib* in the presence or absence of 20-Hydroxyecdysone (20E). (B) Comparison of

989 phenotypes from a classic *phantom* mutant (*phm*<sup>E7</sup>), ubiquitous knock-down of *phm* via

990 CasFB/*phm*<sup>13B</sup>, CasFX/*phm*<sup>13X</sup>, PG-specific manipulation via CRISPR/Cas9, or Cas13 of *phm* in

991 the presence or absence of 20-Hydroxyecdysone (20E). (C) Comparison of phenotypes from a

992 classic *iron regulatory protein 1* mutant (*IRPIA*<sup>KO</sup>), ubiquitous knock-down of *IRPIA* via

993 CasFB/*IRPIA*<sup>13B</sup>, CasFX/*IRPIA*<sup>13X</sup>, PG-specific manipulation via CRISPR/Cas9, or Cas13 of

994 *IRPIA* in the presence or absence of iron in the diet. (D) Porphyria phenotype in PG-specific

995 *IRPIA* knock-down. Scale bar = 250  $\mu$ m. (E) Relative *dib* expression levels in samples

996 representing different PG-specific loss-of-function strategies, including RNAi (IR), dCas9-

997 mediated transcriptional interference, and Cas13 cleavage. Ring glands were dissected from

998 larvae at 42-hour after the L2/L3 molt. \* = p-value < 0.05, \*\* = p-value < 0.01, \*\*\* = p-value <

999 0.001, ns = not significant, p-values based on Dunnett's *post-hoc* test, error bars represent 95%

1000 confidence intervals. (F) Schematic of a construct containing two crRNAs simultaneously

1001 targeting *dib* and *IRPIA* mRNA. (G) Comparison of phenotypes from PG-CasFX/*dl*<sup>13X</sup> in the

1002 presence or absence of either 20E, iron, or both. (H) Relative expression levels of *dib* and *IRPIA*

1003 in single or double knock-down PG samples. Data were normalized to the expression of these

1004 genes in controls. Ring glands were dissected from larvae at 42-hour after the L2/L3 molt. \* = p-

1005 value < 0.05, \*\* = p-value < 0.01, \*\*\* = p-value < 0.001, ns = not significant, p-values based on  
1006 Student's t-tests, error bars represent 95% confidence intervals.

1007

1008 **Figure S1: Schematic of transgenic cell culture and *in vitro* study.** (A) Generation of Sg4\_CD  
1009 cell line that expresses *eCFP*, *DsRed*, and *Neo<sup>R</sup>* genes under independent *actin5C* (*ac5*)  
1010 promoters. (B) Generation of Sg4\* cell line that expresses mutant *eCFP\**, *DsRed*, and *Neo<sup>R</sup>*  
1011 genes under independent *actin5C* (*ac5*) promoters. (C) Establishment of the transgenic cell line.  
1012 Two days after transfection, cells were supplemented with geneticin (G418). Cells without  
1013 transfected plasmid will be eliminated eventually, leaving cells with successful integration. Cells  
1014 were passaged for at least four rounds, and integration was confirmed via sequencing. (D)  
1015 Schematic of pC13cr01 vector activity. Upon transfection with the pC13cr01 vector, the cells  
1016 were selected with geneticin and puromycin to eliminate untransfected cells. Seven days after  
1017 transfection, cells were collected for later study.

1018

1019 **Figure S2: Target sites of crRNAs.** For *in vitro* evaluation, we tested *eCFP* expression and two  
1020 mitochondrial-encoded transcripts, *COXI* and *COXII*. For the *in vivo* approach, we tested two  
1021 genes that encode enzymes acting as ecdysteroid-synthesizing enzymes in the *Drosophila*  
1022 prothoracic gland, *phantom* (*phm*) and *disembodied* (*dib*) and a gene involved in cellular iron  
1023 homeostasis, namely *iron regulatory protein 1A* (*IRP1A*). Shown here are the target sites for  
1024 crRNA (Cas13-compatible, blue), gRNA (Cas9-compatible, red), and RNAi (green) for  
1025 transcripts we tested.

1026



1027 **Figure S3: Evaluation of *Drosophila* codon-optimized Cas13 variants. (A-D)** Western  
1028 blotting of eCFP in samples that were treated with Cas13 variants that showed the highest  
1029 efficiency in qPCR experiments. Band intensities were quantified with ImageJ and normalized to  
1030 samples treated with blank crRNA. \* = p-value < 0.05, \*\* = p-value < 0.01, \*\*\* = p - value <  
1031 0.001, p-values based on Dunnett's *post-hoc* test, error bars represent standard error. **(E)**  
1032 Schematic of Cas13 variants with different signaling sequences, including the nuclear  
1033 localization signal (NLS) and the nuclear export signal (NES). **(F)** Subcellular localization of  
1034 CasFB5 and CasFX4 variants in the presence or absence of NLS and NES. Nuclei were stained  
1035 with dapi (blue) and Cas13 polypeptides were stained with anti-HA antibody (green). Scale bar =  
1036 50  $\mu$ m. **(G)** Evaluation of NLS and NES on Cas13 efficiency via qPCR. Each Cas13 variant was  
1037 either fused with an NLS or NES and tested for their interference efficiency on eCFP expression.  
1038 Data were normalized to samples treated with blank crRNA (blue dotted line = 1). \* = p-value <  
1039 0.05, \*\* = p-value < 0.01, \*\*\* = p-value < 0.001, ns = not significant, p-values based on Student  
1040 t-tests, error bars represent 95% confidence intervals.

1041

1042 **Figure S4: Collateral activity and specificity evaluation of Cas13 variants. (A)** Schematic of  
1043 collateral activity in Cas13. Overall, once a complex is formed with its crRNA, and upon binding  
1044 to target transcripts, Cas13 will undergo a conformational change, which results in the exposure  
1045 of two nuclease domains (HEPN). This exposure allows the domains to interact with nearby non-  
1046 specific transcripts and results in their degradation. **(B)** Relative expression of *DsRed* in samples  
1047 treated with Cas13/crRNA against eCFP. The *act5C* promoter drives DsRed. It is believed that  
1048 the DsRed transcript is present in high amounts, and is more likely to interact with Cas13.

1049 Therefore, if the collateral activity is an issue, we would be expected that DsRed transcript levels  
1050 are affected. Data were normalized to samples treated with blank crRNA (blue dotted line = 1). \*  
1051 = p-value < 0.05, \*\* = p-value < 0.01, \*\*\* = p-value < 0.001, ns = not significant, error bars  
1052 represent 95% confidence intervals. **(C-H)** Relative expression levels of eCFP that were exposed  
1053 to different Cas13 variants and crRNAs carrying different combinations of mismatches along the  
1054 eCFP crRNA 2. Data were normalized to samples treated with blank crRNA (control = C). eCFP  
1055 expression level in Cas13/wild-type (WT) crRNA samples were also included as a reference for  
1056 changes. \* = p-value < 0.05, \*\* = p-value < 0.01, \*\*\* = p-value < 0.001, ns = not significant, p-  
1057 values based on Dunnett's *post-hoc* test, error bars represent 95% confidence intervals.

1058

1059 **Figure S5: Evaluation of modified CasFX for different approaches. (A-B)** Relative  
1060 *Fer1HCH-RA* mRNA amount that was pulled down by the dCasFX/crRNA complex. **(A)**  
1061 dCasFX and the crRNA targeting *Fer1HCH-RA* mRNA (Figure 4E) were transfected together  
1062 into one sample, while *Fer1HCH-RA* was transfected into a different sample of cells. The two  
1063 samples were lysed and combined, followed by immunoprecipitation (IP) of dCasFX via its  
1064 added HA tag to test for the presence of *Fer1HCH-RA* mRNA. Results were analyzed by one-  
1065 way analysis of variance (ANOVA) followed Tukey HSD (HSD = honestly significant  
1066 difference) *post-hoc* test: groups with different letters are statistically different ( $p \leq 0.05$ ) and  
1067 groups with the same letters are statistically equal ( $p \leq 0.05$ ), error bars represent 95%  
1068 confidence intervals. **(B)** dCasFX and crRNA targeting *Fer1HCH-RA* mRNA (Figure 4E) were  
1069 transfected together into one sample. *Fer1HCH-RA* and IRP1A<sup>C450S</sup>, the constitutively RNA-  
1070 binding form of IRP1A that interacts with the iron-responsive element (IRE) in the *Fer1HCH-*

1071 *RA* mRNA, were transfected together into a separate batch of cells. The two samples were lysed  
1072 and combined, followed by immunoprecipitation (IP) of dCasFX via its attached HA tag to test  
1073 for the presence of IRP1A in the pull-down assay (Figure 4E) and *Fer1HCH-RA* transcript.  
1074 Results were analyzed by one-way analysis of variance (ANOVA) followed Tukey HSD (HSD =  
1075 honestly significant difference) *post-hoc* test: groups with different letters are statistically  
1076 different ( $p \leq 0.05$ ) and groups with the same letters are statistically equal ( $p \leq 0.05$ ), error bars  
1077 represent 95% confidence intervals. **(C-D)** Western blotting of COXI and COXII targeted by  
1078 either RNAi, CasFX<sup>O</sup>, or CasFX<sup>mt</sup>. **(E)** Immunofluorescence of COXI and COXII targeted by  
1079 two independent RNAi constructs, CasFX<sup>O</sup> or CasFX<sup>mt</sup>. Nuclei were stained with DAPI (blue),  
1080 COXI was stained with anti-COXI antibody (green), and COXII was stained with anti-COXII  
1081 antibody (red). Scale bar = 50  $\mu$ m. **(F)** Western blotting of wild-type eCFP or mutant eCFP\* with  
1082 blank crRNA under the same condition as FREPAIRv2.

1083

1084 **Figure S6: CRISPR/Cas13 transgenes and crRNA vectors for *in vivo* RNA targeting.** **(A)**  
1085 Collection of Cas13 transgenes. The general Cas13 collection is composed of a *mini-white* gene  
1086 as a marker, a PhiC31 integrase-compatible *attB* site, and the *bla* coding sequence to mediate  
1087 ampicillin resistance and a synthetic core promoter. Shown here are the gateway cassette for an  
1088 enhancer of choice, and the Cas13 variants. The gateway cassette allows using LR Clonase-  
1089 based recombination (ThermoFisher) to insert enhancer/promoter regions to drive tissue-specific  
1090 *Cas9* expression. The *act-Cas13* transgenes drive the expression of *Cas13* via *actin 5C* (*ac5*)  
1091 promoter while the *UAS-Cas13* transgenes allow tissue-specific expression of *Cas13* via the  
1092 Gal4/UAS system. In all cases, Cas13 variants were fused with a 3xHA epitope tag at the C-

1093 terminal end. **(B)** Collection of Cas13-compatible crRNA vectors. pC13X is compatible with  
1094 CasF, whereas pC13B is designed for CasFB. Both vectors carry a *vermillion* marker, a PhiC31  
1095 integrase-compatible *attB* site, and the *bla* coding sequence to mediate ampicillin resistance.  
1096 Each vector holds a multiplex tRNA:crRNA cassette to facilitate the cloning of corresponding  
1097 crRNA via BbsI digestion. The cassette is driven by the ubiquitous *Drosophila* U6:3 promoter  
1098 (dU6:3) and is transcribed as a single transcript. Upon tRNA maturation, crRNA will be released  
1099 and ready to form a complex with Cas13 nuclease.

1100

1101 **Figure S7: *In vivo* efficiency of *Drosophila* codon-optimized CRISPR/Cas13 variants.**

1102 Survival rates of classic mutants (*disembodied: dib*<sup>2</sup>, *phantom: phm*<sup>E7</sup>, *IRP1A: IRP1A*<sup>KO</sup>), reared  
1103 on either regular fly food, fly food supplemented with 20-Hydroxyecdysone (20E), or fly food  
1104 supplemented with iron. Expression of transgenes was either driven by Gal4 (*phm22-Gal4* for  
1105 prothoracic gland-specific expression) or by direct regulation by an enhancer (*act-CasFX*; *act-*  
1106 *CasFB* for ubiquitous expression and *spok-DmC* for prothoracic gland-specific expression).  
1107 CasFX and CasFB are Cas13 variants from this study, while *spok-DmC* drives the expression of  
1108 CRISPR/Cas9 [8]. *dU6-dib*<sup>gR1</sup>, *dU6-phm*<sup>gR1</sup> and *dU6-IRP1A*<sup>gR1</sup> are ubiquitously expressed  
1109 sgRNAs used for CRISPR/Cas9-mediated gene disruption, while all other *dU6* transgenes  
1110 express crRNAs that work in conjunction with Cas13. Data were normalized to the number of  
1111 embryos in the starting population. Error bars represent standard deviation.

1112

1113 **Figure S8: Survival rates of transgenic *Drosophila* lines carrying codon-optimized**

1114 **CRISPR/Cas13.** Survival rates of populations heterozygous or homozygous for Cas13

1115 transgenes, including *act-PspCas13b*, *act-CasFB*, *act-Gal4>UAS-CasFB*, *act-CasRX*, *act-*  
1116 *CasFX*, and *act-Gal4>UAS-CasFX*. Survival rates of the *w<sup>1118</sup>* strain were used as a control. Data  
1117 were normalized to the number of embryos used in the starting population. Error bars represent  
1118 standard deviation.

1119

1120 **Table S1: *Drosophila* codon-optimized Cas13 variants.**

1121

1122 **Table S2: List of plasmids.**

1123

1124 **Table S3: Survival data of all Cas13/crRNAs lines.**

1125

1126 **Table S4: Primers.**

1127

1128 **Supplemental methods S1: Cloning procedures for CRISPR/Cas13-crRNA vectors.**

1129

1130 **References**

- 1131 1. Makarova KS, Aravind L, Wolf YI, Koonin EV. Unification of Cas protein families and a  
1132 simple scenario for the origin and evolution of CRISPR-Cas systems. *Biol Direct.*  
1133 2011;6:38.
- 1134 2. Makarova KS, Wolf YI, Koonin EV. Classification and Nomenclature of CRISPR-Cas  
1135 Systems: Where from Here. *CRISPR J.* 2018;1:325-336.

- 1136 3. Makarova KS et al. Evolutionary classification of CRISPR-Cas systems: a burst of class 2  
1137 and derived variants. *Nat Rev Microbiol.* 2019
- 1138 4. Makarova KS et al. An updated evolutionary classification of CRISPR-Cas systems. *Nat*  
1139 *Rev Microbiol.* 2015;13:722-736.
- 1140 5. van der Oost J, Jore MM, Westra ER, Lundgren M, Brouns SJ. CRISPR-based adaptive  
1141 and heritable immunity in prokaryotes. *Trends Biochem Sci.* 2009;34:401-407.
- 1142 6. Meltzer H et al. Tissue-specific (ts)CRISPR as an efficient strategy for in vivo screening in  
1143 *Drosophila.* *Nat Commun.* 2019;10:2113.
- 1144 7. Guilinger JP, Thompson DB, Liu DR. Fusion of catalytically inactive Cas9 to FokI  
1145 nuclease improves the specificity of genome modification. *Nat Biotechnol.* 2014;32:577-  
1146 582.
- 1147 8. Huynh N, Zeng J, Liu W, King-Jones K. A *Drosophila* CRISPR/Cas9 Toolkit for  
1148 Conditionally Manipulating Gene Expression in the Prothoracic Gland as a Test Case for  
1149 Polytene Tissues. *G3 (Bethesda).* 2018;8:3593-3605.
- 1150 9. Poe AR et al. Robust CRISPR/Cas9-Mediated Tissue-Specific Mutagenesis Reveals Gene  
1151 Redundancy and Perdurance in *Drosophila.* *Genetics.* 2019;211:459-472.
- 1152 10. Port F, Chen HM, Lee T, Bullock SL. Optimized CRISPR/Cas tools for efficient germline  
1153 and somatic genome engineering in *Drosophila.* *Proc Natl Acad Sci U S A.*  
1154 2014;111:E2967-76.
- 1155 11. Xing HL et al. A CRISPR/Cas9 toolkit for multiplex genome editing in plants. *BMC Plant*  
1156 *Biol.* 2014;14:327.

- 1157 12. Port F, Bullock SL. Augmenting CRISPR applications in *Drosophila* with tRNA-flanked  
1158 sgRNAs. *Nat Methods*. 2016;13:852-854.
- 1159 13. Port F et al. A large-scale resource for tissue-specific CRISPR mutagenesis in  
1160 <em><i>Drosophila</i></em>. *bioRxiv*. 2019636076.
- 1161 14. Epinat JC et al. A novel engineered meganuclease induces homologous recombination in  
1162 yeast and mammalian cells. *Nucleic Acids Res*. 2003;31:2952-2962.
- 1163 15. Silva GH, Belfort M, Wende W, Pingoud A. From monomeric to homodimeric  
1164 endonucleases and back: engineering novel specificity of LAGLIDADG enzymes. *J Mol*  
1165 *Biol*. 2006;361:744-754.
- 1166 16. Mandell JG, Barbas CF. Zinc Finger Tools: custom DNA-binding domains for transcription  
1167 factors and nucleases. *Nucleic Acids Res*. 2006;34:W516-23.
- 1168 17. Nakatsukasa T, Shiraishi Y, Negi S, Imanishi M, Futaki S, Sugiura Y. Site-specific DNA  
1169 cleavage by artificial zinc finger-type nuclease with cerium-binding peptide. *Biochem*  
1170 *Biophys Res Commun*. 2005;330:247-252.
- 1171 18. Urnov FD et al. Highly efficient endogenous human gene correction using designed zinc-  
1172 finger nucleases. *Nature*. 2005;435:646-651.
- 1173 19. Joung JK, Sander JD. TALENs: a widely applicable technology for targeted genome  
1174 editing. *Nat Rev Mol Cell Biol*. 2013;14:49-55.
- 1175 20. Miller JC et al. A TALE nuclease architecture for efficient genome editing. *Nat Biotechnol*.  
1176 2011;29:143-148.
- 1177 21. Abudayyeh OO et al. C2c2 is a single-component programmable RNA-guided RNA-  
1178 targeting CRISPR effector. *Science*. 2016;353:aaf5573.

- 1179 22. O'Connell MR. Molecular Mechanisms of RNA Targeting by Cas13-containing Type VI  
1180 CRISPR-Cas Systems. *J Mol Biol.* 2019;431:66-87.
- 1181 23. Abudayyeh OO et al. RNA targeting with CRISPR-Cas13. *Nature.* 2017;550:280-284.
- 1182 24. Bassett AR, Tibbit C, Ponting CP, Liu JL. Highly efficient targeted mutagenesis of  
1183 *Drosophila* with the CRISPR/Cas9 system. *Cell Rep.* 2013;4:220-228.
- 1184 25. Bassett AR, Liu JL. CRISPR/Cas9 and genome editing in *Drosophila*. *J Genet Genomics.*  
1185 2014;41:7-19.
- 1186 26. Brown K, Samarsky D. RNAi off-targeting: Light at the end of the tunnel. *J RNAi Gene*  
1187 *Silencing.* 2006;2:175-177.
- 1188 27. Chavez A et al. Comparison of Cas9 activators in multiple species. *Nat Methods.*  
1189 2016;13:563-567.
- 1190 28. Perrimon N, Mathey-Prevot B. Matter arising: off-targets and genome-scale RNAi screens  
1191 in *Drosophila*. *Fly (Austin).* 2007;1:1-5.
- 1192 29. Bellen HJ et al. The BDGP gene disruption project: single transposon insertions associated  
1193 with 40% of *Drosophila* genes. *Genetics.* 2004;167:761-781.
- 1194 30. Bischof J, Björklund M, Furger E, Schertel C, Taipale J, Basler K. A versatile platform for  
1195 creating a comprehensive UAS-ORFeome library in *Drosophila*. *Development.*  
1196 2013;140:2434-2442.
- 1197 31. Bischof J, Sheils EM, Björklund M, Basler K. Generation of a transgenic ORFeome library  
1198 in *Drosophila*. *Nat Protoc.* 2014;9:1607-1620.
- 1199 32. Kennerdell JR, Carthew RW. Heritable gene silencing in *Drosophila* using double-stranded  
1200 RNA. *Nat Biotechnol.* 2000;18:896-898.



- 1201 33. Yamamoto S et al. A drosophila genetic resource of mutants to study mechanisms  
1202 underlying human genetic diseases. *Cell*. 2014;159:200-214.
- 1203 34. Gratz SJ, Wildonger J, Harrison MM, O'Connor-Giles KM. CRISPR/Cas9-mediated  
1204 genome engineering and the promise of designer flies on demand. *Fly (Austin)*.  
1205 2013;7:249-255.
- 1206 35. Gratz SJ et al. Highly specific and efficient CRISPR/Cas9-catalyzed homology-directed  
1207 repair in *Drosophila*. *Genetics*. 2014;196:961-971.
- 1208 36. Gratz SJ, Rubinstein CD, Harrison MM, Wildonger J, O'Connor-Giles KM. CRISPR-Cas9  
1209 Genome Editing in *Drosophila*. *Curr Protoc Mol Biol*. 2015;111:31.2.1-31.2.20.
- 1210 37. Lin S, Ewen-Campen B, Ni X, Housden BE, Perrimon N. In Vivo Transcriptional  
1211 Activation Using CRISPR/Cas9 in *Drosophila*. *Genetics*. 2015;201:433-442.
- 1212 38. Ren X et al. Optimized gene editing technology for *Drosophila melanogaster* using germ  
1213 line-specific Cas9. *Proc Natl Acad Sci U S A*. 2013;110:19012-19017.
- 1214 39. Xu J et al. A Toolkit of CRISPR-Based Genome Editing Systems in *Drosophila*. *J Genet*  
1215 *Genomics*. 2015;42:141-149.
- 1216 40. Dominguez AA, Lim WA, Qi LS. Beyond editing: repurposing CRISPR-Cas9 for precision  
1217 genome regulation and interrogation. *Nat Rev Mol Cell Biol*. 2016;17:5-15.
- 1218 41. Gupta RM, Musunuru K. Expanding the genetic editing tool kit: ZFNs, TALENs, and  
1219 CRISPR-Cas9. *J Clin Invest*. 2014;124:4154-4161.
- 1220 42. Port F et al. A large-scale resource for tissue-specific CRISPR mutagenesis in *Drosophila*.  
1221 *Elife*. 2020;9

- 1222 43. Zirin J et al. Large-scale transgenic &lt;em>Drosophila</em> resource collections  
1223 for loss- and gain-of-function studies. *bioRxiv*. 2019:852376.
- 1224 44. Ou Q, Zeng J, Yamanaka N, Brakken-Thal C, O'Connor MB, King-Jones K. The Insect  
1225 Prothoracic Gland as a Model for Steroid Hormone Biosynthesis and Regulation. *Cell Rep*.  
1226 2016;16:247-262.
- 1227 45. Danielsen ET et al. A *Drosophila* Genome-Wide Screen Identifies Regulators of Steroid  
1228 Hormone Production and Developmental Timing. *Dev Cell*. 2016;37:558-570.
- 1229 46. Konermann S, Lotfy P, Brideau NJ, Oki J, Shokhirev MN, Hsu PD. Transcriptome  
1230 Engineering with RNA-Targeting Type VI-D CRISPR Effectors. *Cell*. 2018;173:665-  
1231 676.e14.
- 1232 47. Abudayyeh OO et al. A cytosine deaminase for programmable single-base RNA editing.  
1233 *Science*. 2019;365:382-386.
- 1234 48. Abudayyeh OO, Gootenberg JS, Kellner MJ, Zhang F. Nucleic Acid Detection of Plant  
1235 Genes Using CRISPR-Cas13. *CRISPR J*. 2019;2:165-171.
- 1236 49. Aman R et al. RNA virus interference via CRISPR/Cas13a system in plants. *Genome Biol*.  
1237 2018;19:1.
- 1238 50. Cox DBT et al. RNA editing with CRISPR-Cas13. *Science*. 2017;358:1019-1027.
- 1239 51. Freije CA et al. Programmable Inhibition and Detection of RNA Viruses Using Cas13. *Mol*  
1240 *Cell*. 2019;76:826-837.e11.
- 1241 52. Mahas A, Aman R, Mahfouz M. CRISPR-Cas13d mediates robust RNA virus interference  
1242 in plants. *Genome Biol*. 2019;20:263.

- 1243 53. Smargon AA et al. Cas13b Is a Type VI-B CRISPR-Associated RNA-Guided RNase  
1244 Differentially Regulated by Accessory Proteins Csx27 and Csx28. *Mol Cell*. 2017;65:618-  
1245 630.e7.
- 1246 54. Cherbas L et al. Tools for Targeted Genome Engineering of Established *Drosophila* Cell  
1247 Lines. *Genetics*. 2015;201:1307-1318.
- 1248 55. Cherbas L et al. The transcriptional diversity of 25 *Drosophila* cell lines. *Genome Res*.  
1249 2011;21:301-314.
- 1250 56. Laban A, Tobin JF, Curotto de Lafaille MA, Wirth DF. Stable expression of the bacterial  
1251 *neor* gene in *Leishmania enriettii*. *Nature*. 1990;343:572-574.
- 1252 57. Lacalle RA, Pulido D, Vara J, Zalacaín M, Jiménez A. Molecular analysis of the *pac* gene  
1253 encoding a puromycin N-acetyl transferase from *Streptomyces alboniger*. *Gene*.  
1254 1989;79:375-380.
- 1255 58. Lacalle RA, Tercero JA, Jiménez A. Cloning of the complete biosynthetic gene cluster for  
1256 an aminonucleoside antibiotic, puromycin, and its regulated expression in heterologous  
1257 hosts. *EMBO J*. 1992;11:785-792.
- 1258 59. Huynh N, Wang S, King-Jones K. Spatial and temporal control of gene manipulation in  
1259 *Drosophila* via drug-activated Cas9 nucleases. *Insect Biochem Mol Biol*. 2020;103336.
- 1260 60. Jia C et al. New applications of CRISPR/Cas9 system on mutant DNA detection. *Gene*.  
1261 2018;641:55-62.
- 1262 61. Jiang F, Doudna JA. CRISPR-Cas9 Structures and Mechanisms. *Annu Rev Biophys*.  
1263 2017;46:505-529.

- 1264 62. Port F, Muschalik N, Bullock SL. Systematic Evaluation of Drosophila CRISPR Tools  
1265 Reveals Safe and Robust Alternatives to Autonomous Gene Drives in Basic Research. *G3*  
1266 (Bethesda). 2015;5:1493-1502.
- 1267 63. Wang Q et al. The CRISPR-Cas13a Gene-Editing System Induces Collateral Cleavage of  
1268 RNA in Glioma Cells. *Adv Sci (Weinh)*. 2019;6:1901299.
- 1269 64. Caplen NJ, Parrish S, Imani F, Fire A, Morgan RA. Specific inhibition of gene expression  
1270 by small double-stranded RNAs in invertebrate and vertebrate systems. *Proc Natl Acad Sci*  
1271 *U S A*. 2001;98:9742-9747.
- 1272 65. Elbashir SM, Harborth J, Lendeckel W, Yalcin A, Weber K, Tuschl T. Duplexes of 21-  
1273 nucleotide RNAs mediate RNA interference in cultured mammalian cells. *Nature*.  
1274 2001;411:494-498.
- 1275 66. Fire A, Xu S, Montgomery MK, Kostas SA, Driver SE, Mello CC. Potent and specific  
1276 genetic interference by double-stranded RNA in *Caenorhabditis elegans*. *Nature*.  
1277 1998;391:806-811.
- 1278 67. Jackson AL et al. Expression profiling reveals off-target gene regulation by RNAi. *Nat*  
1279 *Biotechnol*. 2003;21:635-637.
- 1280 68. Semizarov D, Frost L, Sarthy A, Kroeger P, Halbert DN, Fesik SW. Specificity of short  
1281 interfering RNA determined through gene expression signatures. *Proc Natl Acad Sci U S*  
1282 *A*. 2003;100:6347-6352.
- 1283 69. Xu D et al. A CRISPR/Cas13-based approach demonstrates biological relevance of vlinc  
1284 class of long non-coding RNAs in anticancer drug response. *Sci Rep*. 2020;10:1794.

- 1285 70. Yan F, Wang W, Zhang J. CRISPR-Cas12 and Cas13: the lesser known siblings of  
1286 CRISPR-Cas9. *Cell Biol Toxicol.* 2019;35:489-492.
- 1287 71. Yang LZ et al. Dynamic Imaging of RNA in Living Cells by CRISPR-Cas13 Systems. *Mol*  
1288 *Cell.* 2019;76:981-997.e7.
- 1289 72. González-Morales N, Mendoza-Ortíz MÁ, Blowes LM, Missirlis F, Riesgo-Escovar JR.  
1290 Ferritin Is Required in Multiple Tissues during *Drosophila melanogaster* Development.  
1291 *PLoS One.* 2015;10:e0133499.
- 1292 73. Gray NK, Pantopoulos K, Dandekar T, Ackrell BA, Hentze MW. Translational regulation  
1293 of mammalian and *Drosophila* citric acid cycle enzymes via iron-responsive elements. *Proc*  
1294 *Natl Acad Sci U S A.* 1996;93:4925-4930.
- 1295 74. Huynh N, Ou Q, Cox P, Lill R, King-Jones K. Glycogen branching enzyme controls  
1296 cellular iron homeostasis via Iron Regulatory Protein 1 and mitoNEET. *Nat Commun.*  
1297 2019;10:5463.
- 1298 75. Melefors O. Translational regulation in vivo of the *Drosophila melanogaster* mRNA  
1299 encoding succinate dehydrogenase iron protein via iron responsive elements. *Biochem*  
1300 *Biophys Res Commun.* 1996;221:437-441.
- 1301 76. Surdej P, Richman L, Kühn LC. Differential translational regulation of IRE-containing  
1302 mRNAs in *Drosophila melanogaster* by endogenous IRP and a constitutive human IRP1  
1303 mutant. *Insect Biochem Mol Biol.* 2008;38:891-894.
- 1304 77. Chiaratti MR et al. Maternal transmission of mitochondrial diseases. *Genet Mol Biol.*  
1305 2020;43:e20190095.

- 1306 78. Russell O, Turnbull D. Mitochondrial DNA disease-molecular insights and potential routes  
1307 to a cure. *Exp Cell Res.* 2014;325:38-43.
- 1308 79. Viscomi C, Zeviani M. Strategies for fighting mitochondrial diseases. *J Intern Med.* 2020
- 1309 80. Chen Z et al. Genetic mosaic analysis of a deleterious mitochondrial DNA mutation in  
1310 *Drosophila* reveals novel aspects of mitochondrial regulation and function. *Mol Biol Cell.*  
1311 2015;26:674-684.
- 1312 81. Hill JH, Chen Z, Xu H. Selective propagation of functional mitochondrial DNA during  
1313 oogenesis restricts the transmission of a deleterious mitochondrial variant. *Nat Genet.*  
1314 2014;46:389-392.
- 1315 82. Ma H, Xu H, O'Farrell PH. Transmission of mitochondrial mutations and action of  
1316 purifying selection in *Drosophila melanogaster*. *Nat Genet.* 2014;46:393-397.
- 1317 83. Jepson JE, Savva YA, Yokose C, Sugden AU, Sahin A, Reenan RA. Engineered alterations  
1318 in RNA editing modulate complex behavior in *Drosophila*: regulatory diversity of  
1319 adenosine deaminase acting on RNA (ADAR) targets. *J Biol Chem.* 2011;286:8325-8337.
- 1320 84. Niwa R et al. CYP306A1, a cytochrome P450 enzyme, is essential for ecdysteroid  
1321 biosynthesis in the prothoracic glands of *Bombyx* and *Drosophila*. *J Biol Chem.*  
1322 2004;279:35942-35949.
- 1323 85. Warren JT et al. Phantom encodes the 25-hydroxylase of *Drosophila melanogaster* and  
1324 *Bombyx mori*: a P450 enzyme critical in ecdysone biosynthesis. *Insect Biochem Mol Biol.*  
1325 2004;34:991-1010.
- 1326 86. Lind MI et al. Of two cytosolic aconitases expressed in *Drosophila*, only one functions as  
1327 an iron-regulatory protein. *J Biol Chem.* 2006;281:18707-18714.

- 1328 87. Niwa YS, Niwa R. Transcriptional regulation of insect steroid hormone biosynthesis and its  
1329 role in controlling timing of molting and metamorphosis. *Dev Growth Differ.* 2016;58:94-  
1330 105.
- 1331 88. Buchman AB, Brogan DJ, Sun R, Yang T, Hsu PD, Akbari OS. Programmable RNA  
1332 Targeting Using CasRx in Flies. *CRISPR J.* 2020;3:164-176.
- 1333 89. Gootenberg JS, Abudayyeh OO, Kellner MJ, Joung J, Collins JJ, Zhang F. Multiplexed and  
1334 portable nucleic acid detection platform with Cas13, Cas12a, and Csm6. *Science.*  
1335 2018;360:439-444.
- 1336 90. Kellner MJ, Koob JG, Gootenberg JS, Abudayyeh OO, Zhang F. Author Correction:  
1337 SHERLOCK: nucleic acid detection with CRISPR nucleases. *Nat Protoc.* 2020;15:1311.
- 1338 91. Metsky HC, Freije CA, Kosoko-Thoroddsen T-SF, Sabeti PC, Myhrvold C. CRISPR-based  
1339 COVID-19 surveillance using a genomically-comprehensive machine learning approach.  
1340 bioRxiv. 20202020.02.26.967026.
- 1341 92. Daniel E, Onwukwe GU, Wierenga RK, Quaggin SE, Vainio SJ, Krause M. ATGme:  
1342 Open-source web application for rare codon identification and custom DNA sequence  
1343 optimization. *BMC Bioinformatics.* 2015;16:303.
- 1344 93. Puigbò P, Guzmán E, Romeu A, Garcia-Vallvé S. OPTIMIZER: a web server for  
1345 optimizing the codon usage of DNA sequences. *Nucleic Acids Res.* 2007;35:W126-31.
- 1346 94. Behura SK, Severson DW. Codon usage bias: causative factors, quantification methods and  
1347 genome-wide patterns: with emphasis on insect genomes. *Biol Rev Camb Philos Soc.*  
1348 2013;88:49-61.

- 1349 95. Nakamura Y, Gojobori T, Ikemura T. Codon usage tabulated from international DNA  
1350 sequence databases: status for the year 2000. *Nucleic Acids Res.* 2000;28:292.
- 1351 96. Vicario S, Moriyama EN, Powell JR. Codon usage in twelve species of *Drosophila*. *BMC*  
1352 *Evol Biol.* 2007;7:226.
- 1353 97. Sharp PM, Li WH. The codon Adaptation Index--a measure of directional synonymous  
1354 codon usage bias, and its potential applications. *Nucleic Acids Res.* 1987;15:1281-1295.
- 1355 98. Goetz RM, Fuglsang A. Correlation of codon bias measures with mRNA levels: analysis of  
1356 transcriptome data from *Escherichia coli*. *Biochem Biophys Res Commun.* 2005;327:4-7.
- 1357 99. Henry I, Sharp PM. Predicting gene expression level from codon usage bias. *Mol Biol*  
1358 *Evol.* 2007;24:10-12.
- 1359 100. Wright F. The 'effective number of codons' used in a gene. *Gene.* 1990;87:23-29.
- 1360 101. Gruber AR, Lorenz R, Bernhart SH, Neuböck R, Hofacker IL. The Vienna RNA websuite.  
1361 *Nucleic Acids Res.* 2008;36:W70-4.
- 1362 102. Mathews DH. RNA Secondary Structure Analysis Using RNAstructure. *Curr Protoc*  
1363 *Bioinformatics.* 2014;46:12.6.1-25.
- 1364 103. Reuter JS, Mathews DH. RNAstructure: software for RNA secondary structure prediction  
1365 and analysis. *BMC Bioinformatics.* 2010;11:129.
- 1366 104. Tan Z, Fu Y, Sharma G, Mathews DH. TurboFold II: RNA structural alignment and  
1367 secondary structure prediction informed by multiple homologs. *Nucleic Acids Res.*  
1368 2017;45:11570-11581.
- 1369 105. Tafer H et al. The impact of target site accessibility on the design of effective siRNAs. *Nat*  
1370 *Biotechnol.* 2008;26:578-583.



- 1371 106. Zhu H, Richmond E, Liang C. CRISPR-RT: a web application for designing CRISPR-C2c2  
1372 crRNA with improved target specificity. *Bioinformatics*. 2018;34:117-119.
- 1373 107. González M, Martín-Ruiz I, Jiménez S, Pirone L, Barrio R, Sutherland JD. Generation of  
1374 stable *Drosophila* cell lines using multicistronic vectors. *Sci Rep*. 2011;1:75.
- 1375 108. Hadjantonakis AK, Macmaster S, Nagy A. Embryonic stem cells and mice expressing  
1376 different GFP variants for multiple non-invasive reporter usage within a single animal.  
1377 *BMC Biotechnol*. 2002;2:11.
- 1378 109. Semple JI, Biondini L, Lehner B. Generating transgenic nematodes by bombardment and  
1379 antibiotic selection. *Nat Methods*. 2012;9:118-119.
- 1380 110. Wang JW, Beck ES, McCabe BD. A modular toolset for recombination transgenesis and  
1381 neurogenetic analysis of *Drosophila*. *PLoS One*. 2012;7:e42102.
- 1382 111. Gibson DG, Young L, Chuang RY, Venter JC, Hutchison CA, Smith HO. Enzymatic  
1383 assembly of DNA molecules up to several hundred kilobases. *Nat Methods*. 2009;6:343-  
1384 345.
- 1385 112. Iwaki T, Figuera M, Ploplis VA, Castellino FJ. Rapid selection of *Drosophila* S2 cells with  
1386 the puromycin resistance gene. *Biotechniques*. 2003;35:482-4, 486.
- 1387 113. Iwaki T, Castellino FJ. A single plasmid transfection that offers a significant advantage  
1388 associated with puromycin selection in *Drosophila* Schneider S2 cells expressing  
1389 heterologous proteins. *Cytotechnology*. 2008;57:45-49.
- 1390 114. Liu T, Sims D, Baum B. Parallel RNAi screens across different cell lines identify generic  
1391 and cell type-specific regulators of actin organization and cell morphology. *Genome Biol*.  
1392 2009;10:R26.

- 1393 115. Fish MP, Groth AC, Calos MP, Nusse R. Creating transgenic *Drosophila* by microinjecting  
1394 the site-specific phiC31 integrase mRNA and a transgene-containing donor plasmid. *Nat*  
1395 *Protoc.* 2007;2:2325-2331.
- 1396 116. Rao X, Huang X, Zhou Z, Lin X. An improvement of the  $2^{-(\Delta\Delta CT)}$  method for  
1397 quantitative real-time polymerase chain reaction data analysis. *Biostat Bioinforma*  
1398 *Biomath.* 2013;3:71-85.
- 1399
- 1400

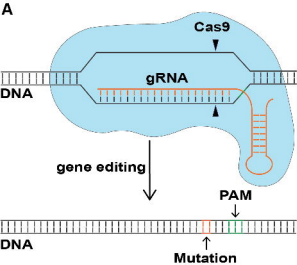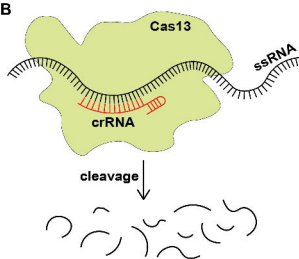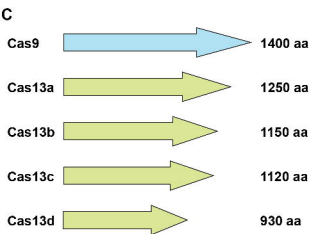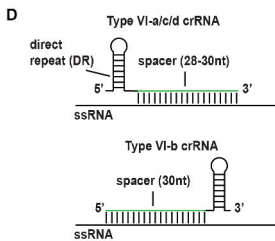

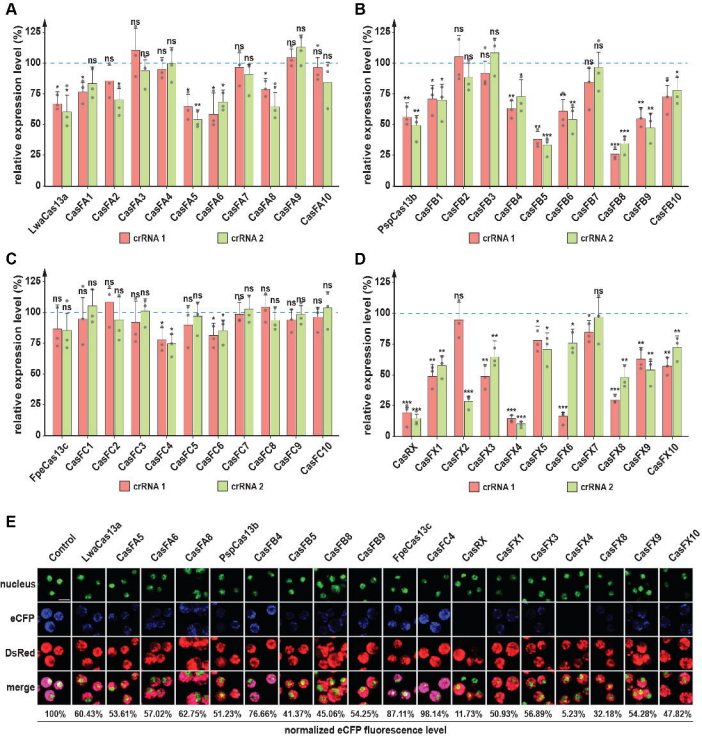

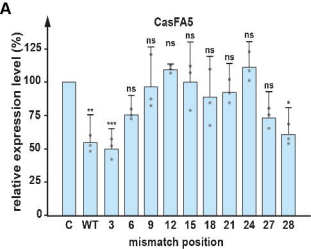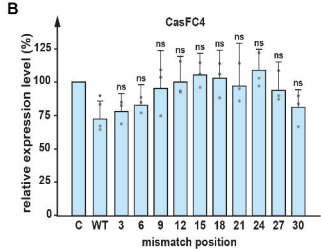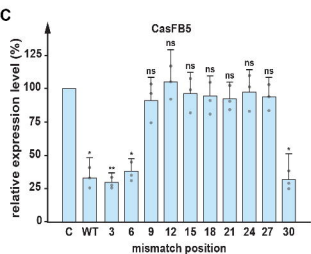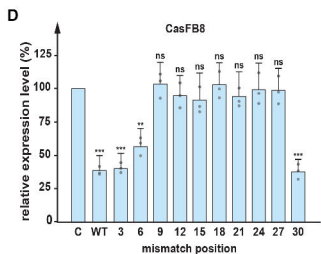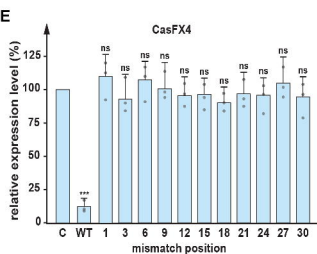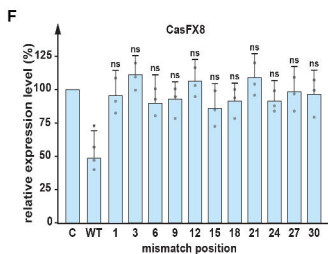

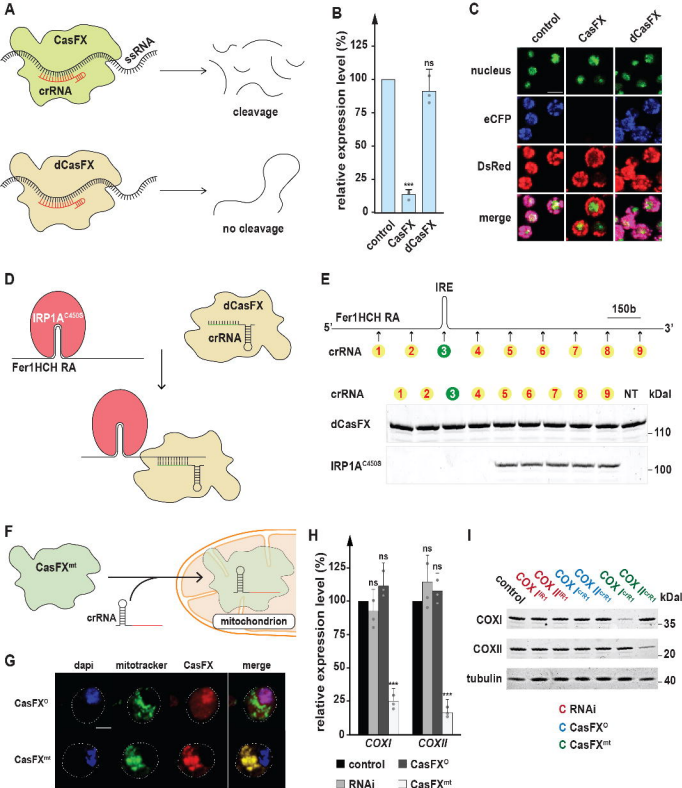

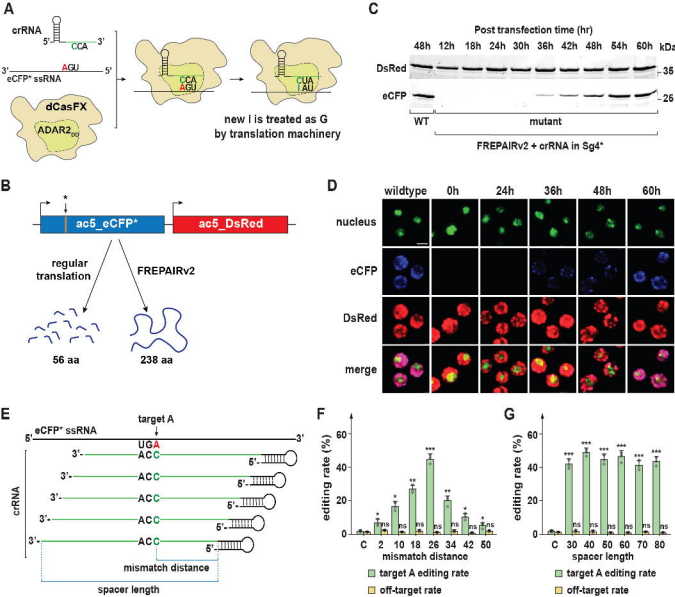

Huynh, Depner, Larson and King-Jones, Figure 5

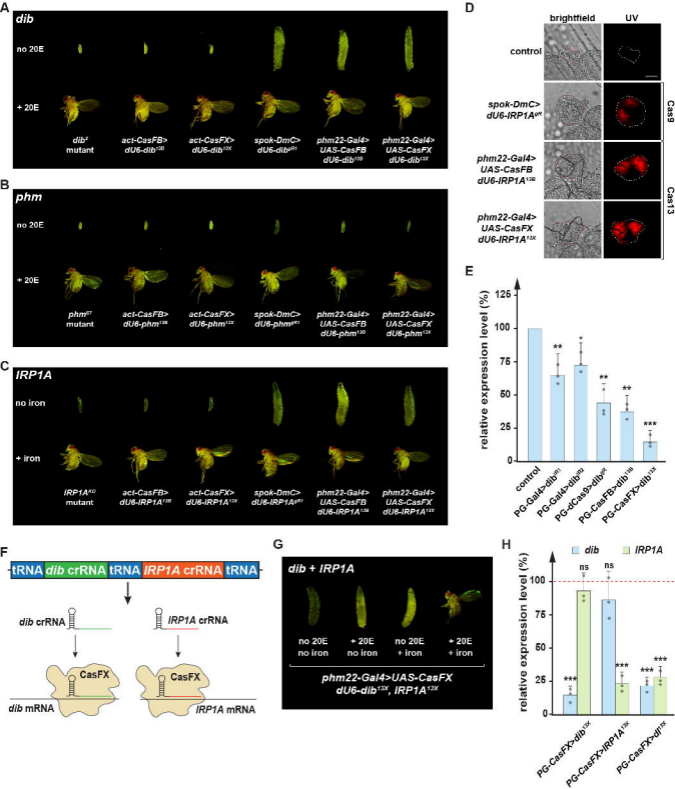



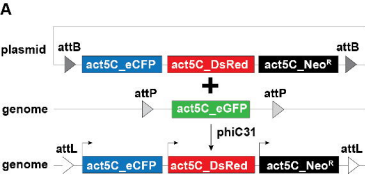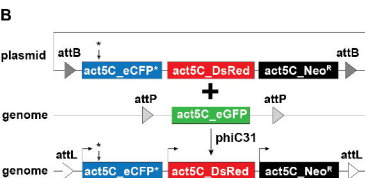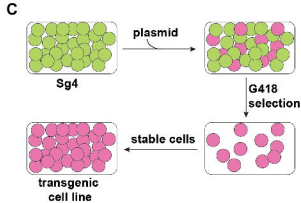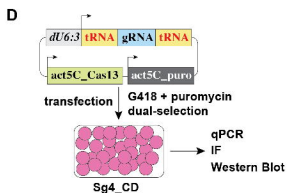

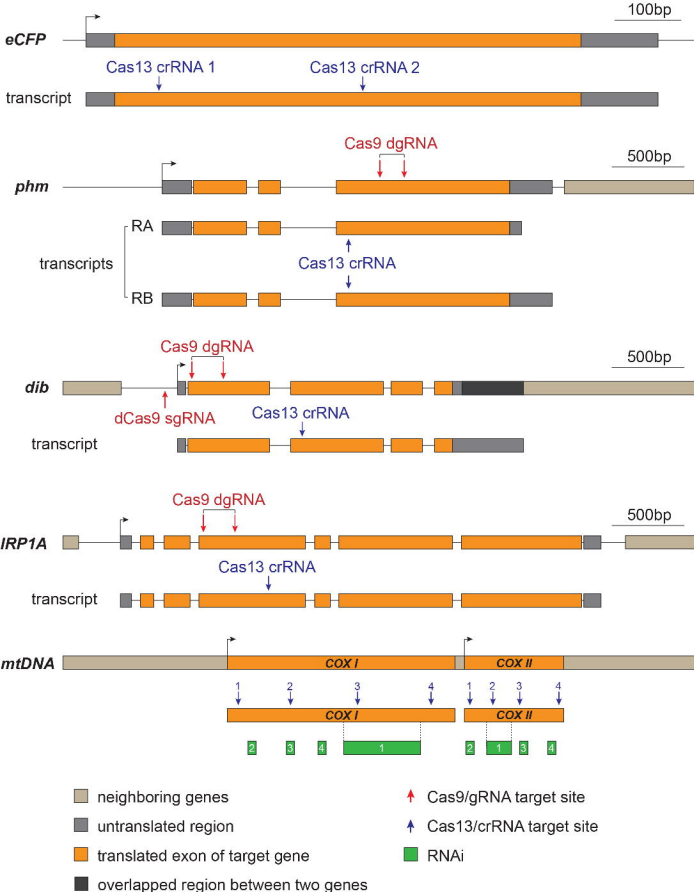

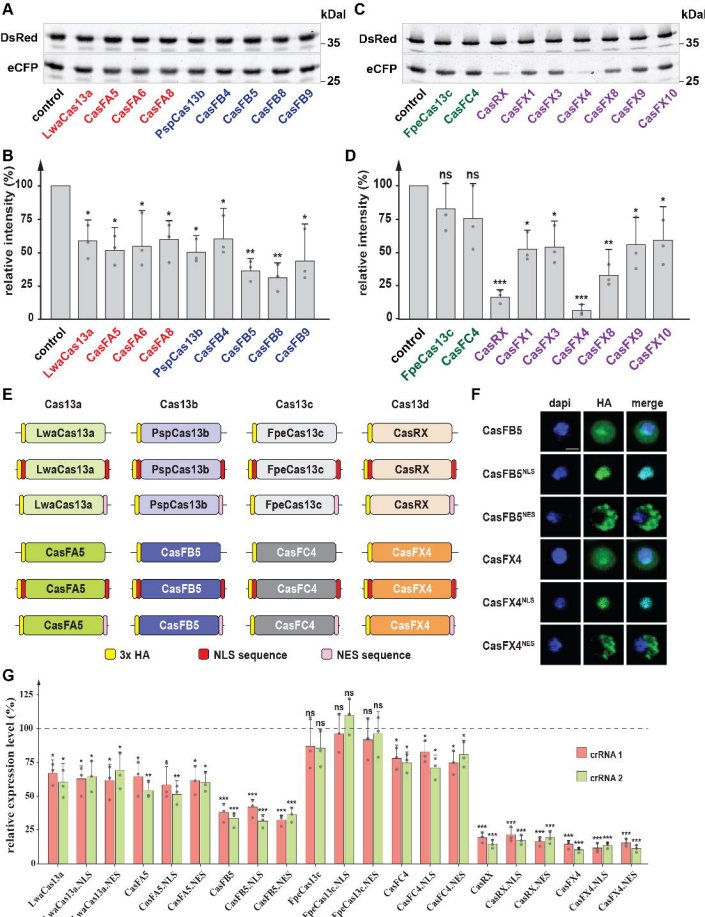

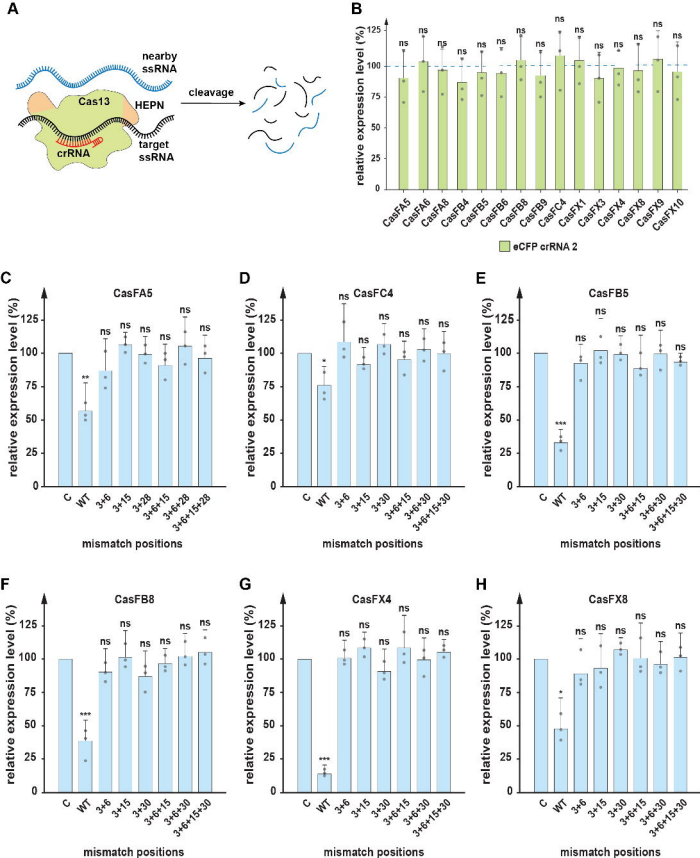

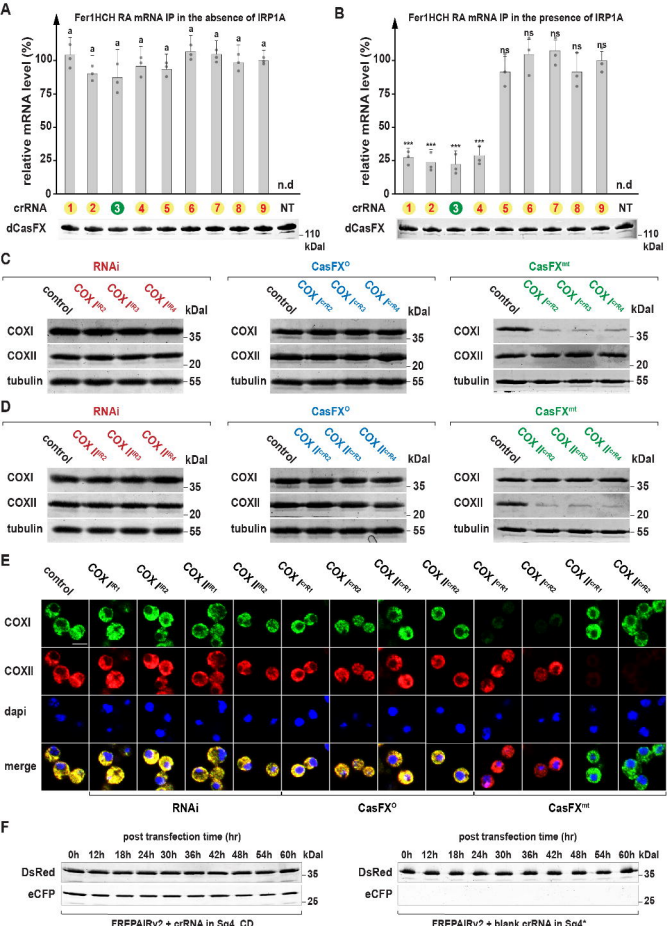

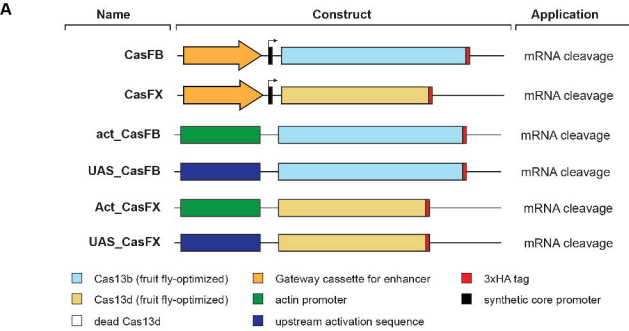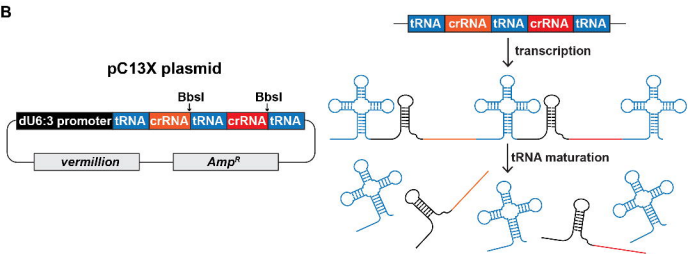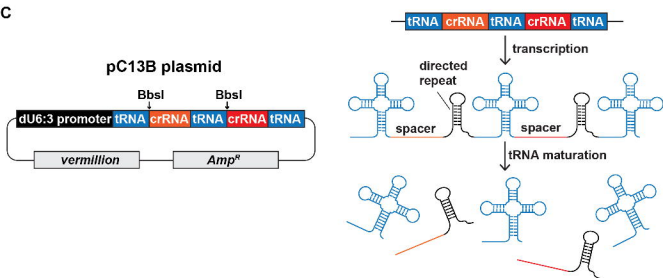

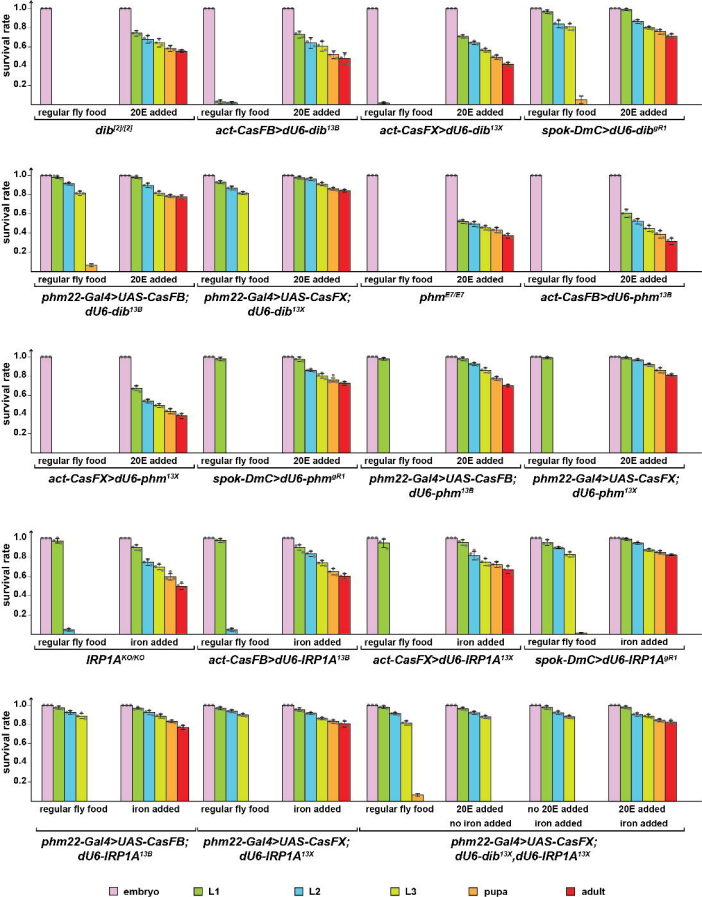

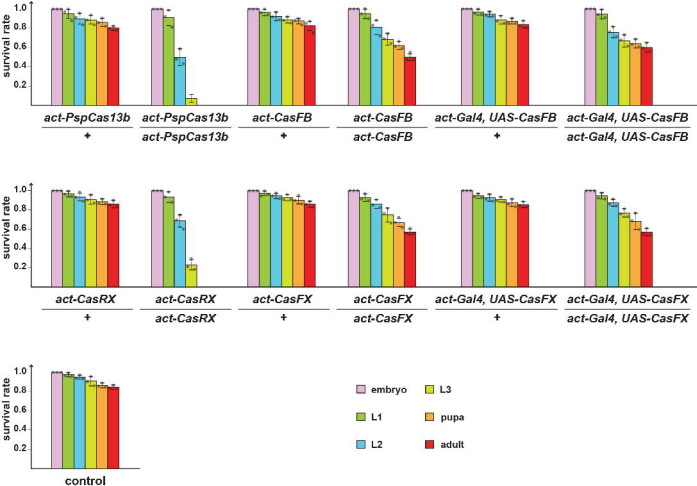

Source: https://biorxiv.org/content/10.1101/2020.09.25.314047v1.full.pdf
